1 **Nanopore-based native RNA sequencing provides insights into**  
2 **prokaryotic transcription, operon structures, rRNA maturation and**  
3 **modifications**

4

5 Felix Grünberger<sup>1</sup>, Robert Knüppel<sup>2</sup>, Michael Jüttner<sup>2</sup>, Martin Fenk<sup>1</sup>, Andreas Borst<sup>3</sup>, Robert Reichelt<sup>1</sup>,  
6 Winfried Hausner<sup>1</sup>, Jörg Soppa<sup>3</sup>, Sebastien Ferreira-Cerca<sup>2\*</sup>, and Dina Grohmann<sup>1\*</sup>

7

8 <sup>1</sup> Institute of Biochemistry, Genetics and Microbiology, Institute of Microbiology and Archaea Centre,  
9 Single-Molecule Biochemistry Lab & Biochemistry Centre Regensburg, University of Regensburg,  
10 Universitätsstraße 31, 93053 Regensburg, Germany

11 <sup>2</sup> Institute for Biochemistry, Genetics and Microbiology, Biochemistry III, University of Regensburg,  
12 Universitätsstraße, 31, 93053 Regensburg, Germany.

13 <sup>3</sup> Goethe-University, Biocentre, Institute for Molecular Biosciences, Max-von-Laue-Str. 9, D-60439  
14 Frankfurt, Germany

15

16

17 \*For correspondence:

18 Sébastien Ferreira-Cerca  
19 Biochemistry III – Institute for Biochemistry, Genetics and Microbiology, University of Regensburg,  
20 Universitätsstraße 31, 93053 Regensburg, Germany.

21 e-mail: [sebastien.ferreira-cerca@ur.de](mailto:sebastien.ferreira-cerca@ur.de)

22 Tel.: 0049 941 943 2539

23 Fax: 0049 941 943 2474

24

25 Dina Grohmann  
26 Department of Biochemistry, Genetics and Microbiology, Institute of Microbiology, University of  
27 Regensburg, Universitätsstraße 31, 93053 Regensburg, Germany

28 e-mail: [dina.grohmann@ur.de](mailto:dina.grohmann@ur.de)

29 Tel.: 0049 941 943 3147

30 Fax: 0049 941 943 2403

31

32 **Keywords:** Nanopore, RNA-seq, next generation sequencing, transcription, ribosomal RNA, RNA  
33 modifications, transcriptome, archaea, bacteria

34 **Abstract** (186 words)

35 The prokaryotic transcriptome is shaped by transcriptional and posttranscriptional events that  
36 define the characteristics of an RNA, including transcript boundaries, the base modification status,  
37 and processing pathways to yield mature RNAs. Currently, a combination of several specialised  
38 short-read sequencing approaches and additional biochemical experiments are required to  
39 describe all transcriptomic features. In this study, we present native RNA sequencing of bacterial  
40 (*E. coli*) and archaeal (*H. volcanii*, *P. furiosus*) transcriptomes employing the Oxford Nanopore  
41 sequencing technology. Based on this approach, we could address multiple transcriptomic  
42 characteristics simultaneously with single-molecule resolution. Taking advantage of long RNA  
43 reads provided by the Nanopore platform, we could accurately (re-)annotate large transcriptional  
44 units and boundaries. Our analysis of transcription termination sites revealed that diverse  
45 termination mechanisms are in place in archaea. Moreover, we shed light on the poorly understood  
46 rRNA processing pathway in archaea and detected new processing intermediates. One of the key  
47 features of native RNA sequencing is that RNA modifications are retained. We could confirm this  
48 ability by analysing the well-known KsgA-dependent rRNA methylation sites. Notably, our analysis  
49 suggests that rRNA modifications are more abundant in a hyperthermophilic organism.

50

51

52

## 53 Introduction

54 In the last decade, next-generation sequencing (NGS) technologies<sup>1</sup> revolutionized the field of  
55 microbiology<sup>2</sup>, which is not only reflected in the exponential increase in the number of fully  
56 sequenced microbial genomes, but also in the detection of microbial diversity in many hitherto  
57 inaccessible habitats based on metagenomics. Using transcriptomics, important advances were  
58 also possible in the field of RNA biology<sup>3,4</sup> that shaped our understanding of the transcriptional  
59 landscape<sup>5,6</sup> and RNA-mediated regulatory processes in prokaryotes<sup>7</sup>. RNA sequencing (RNA-seq)  
60 technologies can be categorized according to their platform-dependent read lengths and necessity  
61 of a reverse transcription and amplification steps, to generate cDNA<sup>8</sup>. Illumina sequencing yields  
62 highly accurate yet short sequencing reads (commonly 100-300 bp). Hence, sequence information  
63 is only available in a fragmented form, making full-length transcript- or isoform-detection a  
64 challenging task<sup>9,10</sup>. Sequencing platforms developed by Pacific Bioscience (PacBio) and Oxford  
65 Nanopore Technologies (ONT) solved this issue. Both sequencing methods are *bona fide* single-  
66 molecule sequencing techniques that allow sequencing of long DNAs or RNAs<sup>11,12</sup>. However, the  
67 base detection differs significantly between the two methods. PacBio-sequencers rely on  
68 fluorescence-based single-molecule detection that identifies bases based on the unique fluorescent  
69 signal of each nucleotide during DNA synthesis by a dedicated polymerase<sup>11</sup>. In contrast, in an ONT  
70 sequencer, the DNA or RNA molecule is pushed through a membrane-bound biological pore with  
71 the aid of a motor protein that is attached to the pore protein called a nanopore (Fig. 1a). A change  
72 in current is caused by the translocation of the DNA or RNA strand through this nanopore, which  
73 serves as a readout signal for the sequencing process. Due to the length of the nanopore (version  
74 R9.4), a stretch of approximately five bases contributes to the current signal. Notably, only ONT  
75 offers the possibility to directly sequence native RNAs without the need for prior cDNA synthesis  
76 and PCR amplification<sup>13</sup>. As RNAs are directly “read”, RNA modifications are maintained and first  
77 attempts have been made to use ONT sequencing to identify RNA base modifications (e.g.  
78 methylations<sup>14,15</sup>). As ONT-based native RNA-seq holds the capacity to sequence full-length  
79 transcripts, to identify RNA base modifications and to detect molecular heterogeneity in a  
80 transcriptome, the technology found widespread attention<sup>16</sup>. Recently, the technology was  
81 exploited to sequence viral RNA genomes<sup>17-20</sup> to gain insights into viral and eukaryotic

82 transcriptomes<sup>19,21-23</sup> and to detect RNA isoforms in eukaryotes<sup>24,25</sup>. However, prokaryotic  
83 transcriptomes have not been characterized on the genome-wide level by native RNA-seq  
84 approaches so far as prokaryotic RNAs lack a poly(A) tail which is required to capture the RNA and  
85 feed it into the nanopore.

86 Here, we present a native RNA sequencing study of bacterial and archaeal transcriptomes using  
87 Nanopore technology. We employed an experimental workflow that includes the enzymatic  
88 polyadenylation of prokaryotic RNA to make them amenable for ONT's direct RNA sequencing kit.  
89 We evaluated the accuracy and reliability of native RNA-seq in comparison to published Illumina-  
90 based sequencing studying prokaryotic transcriptomes of bacterial (*E. coli*) and archaeal  
91 (*Haloferax volcanii*, *Pyrococcus furiosus*) model organisms<sup>26-31</sup>. The transcriptomic analysis  
92 included determination of transcript boundaries, providing, among others, insights into  
93 termination mechanisms in archaea. We moreover demonstrate that the long RNA reads gathered  
94 on the ONT platform allow reliable transcriptional unit assignment. Strikingly, we gained insights  
95 into the so far poorly understood ribosomal RNA (rRNA) maturation pathway in archaea and  
96 detected putative new rRNA processing intermediates. As RNA modifications are retained when  
97 sequencing native RNAs, we explore rRNA modifications in prokaryotes. Notably, by expanding  
98 the approach, our analysis suggests that rRNA modifications are more abundant in an  
99 hyperthermophilic organism.

100

101

## 102 **Material and Methods**

### 103 **Strains and growth conditions**

104 *Escherichia coli* K-12 MG1655 cells were grown in LB medium (10 g tryptone, 5 g yeast extract, 10  
105 g NaCl per liter) to an OD<sub>600nm</sub> of 0.5 and harvested by centrifugation at 3,939 x g for 10 min at 4°C.

106

107 *Pyrococcus furiosus* strain DSM 3638 cells were grown anaerobically in 40 ml SME medium<sup>32</sup>  
108 supplemented with 40 mM pyruvate, 0.1 % peptone and 0.1 % yeast extract at 95°C to mid-  
109 exponential phase and further harvested by centrifugation at 3,939 x g for 45 min at 4°C.

110

111 Markerless deletion of *Haloferax volcanii* KsgA (Hvo\_2746) was obtained using the pop-in/pop-  
112 out procedure<sup>33</sup>. Deletion candidates were verified by Southern blot and PCR analyses. Full  
113 characterization of this strain will be described elsewhere (Knüppel and Ferreira-Cerca, *in*  
114 *preparation*). Wildtype (H26) and  $\Delta ksgA$  strains were grown in Hv-YPC medium at 42°C under  
115 agitation as described previously<sup>34</sup>.

116

### 117 **RNA isolation**

118 *E. coli* total RNA was purified using the Monarch® Total RNA Miniprep Kit (New England Biolabs)  
119 according to manufacturer's instructions including the recommended on-column DNase  
120 treatment.

121

122 *P. furiosus* cell pellets were lysed by the addition of 1 ml peqGOLD TriFast™ (VWR) followed by  
123 shaking for 10 min at room temperature. After adding 0.2 ml 2 M sodium acetate pH 4.0, total RNA  
124 was isolated according to the manufacturer's instructions. Contaminating DNA was removed using  
125 the TURBO DNA-free™ Kit (Thermo Fisher Scientific).

126

127 *H. volcanii*

128 *H. volcanii* total RNA was purified using the RNA easy kit (Qiagen) according to the manufacturer's  
129 instructions. Alternatively, total RNA was isolated according to the method described by

130 Chomczynski and Sacchi<sup>35</sup>, including a DNA-removal step with RNase-free DNase I (Thermo  
131 Scientific).

132

133 The Integrity of total RNA from *E. coli* and *P. furiosus* was assessed via a Bioanalyzer (Agilent) run  
134 using the RNA 6000 Pico Kit (Agilent). To evaluate the extent of remaining buffer and DNA  
135 contaminations, the RNA preparation samples were tested using standard spectroscopic  
136 measurements (Nanodrop One) and using the Qubit 1X dsDNA HS assay kit (Thermo Fisher  
137 Scientific). RNA was quantified using the Qubit RNA HS assay kit.

138

### 139 **Primer extension analysis**

140 5'ends determination of mature 16S and 23S rRNAs from *H. volcanii* by primer extension was  
141 performed as described previously (Knüppel et al, Method in Molecular Biology *in press*). In brief,  
142 reverse transcription was performed with the indicated fluorescently labeled primers (oHv396-  
143 DY682: 5'-CCCAATAGCAATGACCTCCG; oHv622-DY782: 5'-GCTCTCGAGCCGAGCTATCCACC) and  
144 SuperScript III reverse transcriptase using 1 µg of total RNA as template. The resulting cDNAs and  
145 reference dideoxy-chain termination sequencing ladder reactions were separated on a denaturing  
146 14 % TBE-Urea (6 M)-PAGE. Fluorescence signals (700nm and 800nm) were acquired using a Li-  
147 COR Odyssey system.

148

### 149 **RNA treatment and poly(A)-tailing**

150 To prevent secondary structure formation, the RNA was heat incubated at 70°C for 3 min and  
151 immediately put on ice before TEX-treatment or poly(A)-tailing of the RNA samples. Partial  
152 digestion of RNAs that are not 5'-triphosphorylated (e.g. tRNAs, rRNAs) was achieved by  
153 incubation of the RNA with the Terminator 5'-Phosphate-Dependent Exonuclease (TEX, Lucigen).  
154 For this purpose, 10 µg of RNA was incubated with 1 unit TEX, 2 µl TEX reaction buffer (Lucigen)  
155 and 0.5 µl RiboGuard RNase Inhibitor (Lucigen) in a total volume of 20 µl for 60 minutes at 30°C.  
156 The reaction was stopped and the RNA was purified using the RNeasy MinElute Cleanup Kit  
157 (Qiagen). For *P. furiosus* and *E. coli* RNA samples, control reactions lacking the exonuclease

158 (NOTEX) were treated as described for TEX-containing samples. In the next step, a poly(A)-tail was  
159 added using the *E. coli* poly(A) polymerase (New England Biolabs) following a recently published  
160 protocol<sup>36</sup>. Briefly, 5 µg RNA, 20 units poly(A) polymerase, 2 µl reaction buffer and 1 mM ATP were  
161 incubated for 15 min at 37°C in a total reaction volume of 50 µl. To stop the reaction and to remove  
162 the enzyme, the poly(A)-tailed RNA was purified with the RNeasy MinElute Cleanup Kit (Qiagen).  
163

#### 164 **Direct RNA library preparation and sequencing**

165 Libraries for Nanopore sequencing were prepared from poly(A)-tailed RNAs according to the SQK-  
166 RNA001 Kit protocol (Oxford Nanopore, Version: DRS\_9026\_v1\_revP\_15Dec2016) with minor  
167 modifications for barcoded libraries (see Supplementary Fig. 1a). In this case, Agencourt AMPure  
168 XP magnetic beads (Beckman Coulter) in combination with 1 µl of RiboGuard RNase Inhibitor  
169 (Lucigen) were used instead of the recommended Agencourt RNAClean XP beads to purify samples  
170 after enzymatic reactions. The total amount of input RNA, the barcoding strategy and the number  
171 of flowcells used can be found in Supplementary Table 1. The efficiency of poly(A)-tailing was low.  
172 However, this could be compensated with a higher amount of input RNA. We added the ONT  
173 control RNA (RCS, yeast) to detect problems that arise from library preparation or sequencing. For  
174 the barcoded libraries, the RTA adapter was replaced by custom adapters described in  
175 <https://github.com/hyeshik/poreplex> and reverse transcription (RT) was performed in individual  
176 tubes for each library. After RT reactions, cDNA was quantified using the Qubit DNA HS assay kit  
177 (Thermo Fisher Scientific) and equimolar amounts of DNA for the multiplexed samples were used  
178 in the next step for ligation of the RNA Adapter (RMX) in a single tube. Subsequent reactions were  
179 performed according to the protocols recommended by ONT. The libraries were sequenced on a  
180 MinION using R9.4 flow cells and subsequently, FAST5 files were generated using the  
181 recommended script in MinKNOW.

182

#### 183 **Data analysis**

184 *Demultiplexing of raw reads, basecalling and quality control of raw reads*

185 As some bioinformatic tools depend on single-read files we first converted multi-read FAST5 files  
186 from the MinKNOW output to single-read FAST5 files using the `ont_fast5_api` from Oxford  
187 Nanopore ([https://github.com/nanoporetech/ont\\_fast5\\_api](https://github.com/nanoporetech/ont_fast5_api)). To prevent actual good-quality  
188 reads from being discarded (this issue was reported previously<sup>13,37</sup>), we included both failed and  
189 passed read folders in the following steps of the analysis. Demultiplexing was done by `poreplex`  
190 (version 0.4, <https://github.com/hyeshik/poreplex>) with the arguments `--trim-adapter`, `--`  
191 `symlink-fast5`, `--basecall` and `--barcoding`, to trim off adapter sequences in output FASTQ files,  
192 basecall using `albacore`, create symbolic links to FAST5 files and sort the reads according to their  
193 barcodes. However, to ensure consistency between non-multiplexed and multiplexed samples and  
194 because of some major improvements in the current basecalling software (`guppy`), `albacore` files  
195 were not used. Instead demultiplexed FAST5 reads and raw FAST5 reads from non-multiplexed  
196 runs were locally basecalled using `Guppy` (Version 3.0.3) with `--reverse_sequence`, `--hp_correct`, `--`  
197 `enable_trimming` and `--calib_detect` turned on. After that, relevant information from the  
198 `sequencing_summary.txt` file in the `Guppy` output was extracted to analyse properties of raw reads  
199 (see Supplementary Fig. 2, see Supplementary Table 1).

200

#### 201 *Mapping of reads and quantification*

202 Files were mapped to reference genomes from *Escherichia coli* K12 MG1655 (GenBank:  
203 U00096.2)<sup>38</sup>, *Haloferax volcanii* (NCBI Reference Sequence NC\_013967)<sup>39</sup> and *Pyrococcus furiosus*  
204 DSM3638<sup>31</sup> using `minimap2` (Release 2.17-r941, <https://github.com/lh3/minimap2>)<sup>40</sup>. Output  
205 alignments in the SAM format were generated with the recommended options for noisy Nanopore  
206 Direct RNA-seq (`-ax splice`, `-uf`, `-k14`) and also with (1) `-p` set to 0.99, to return primary and  
207 secondary mappings and (2) with `--MD` turned on, to include the MD tag for calculating mapping  
208 identities. Alignment files were further converted to bam files, sorted and indexed using  
209 `SAMtools`<sup>41</sup>. Strand-specific wig and bigwig files were finally created using `bam2wig` (Version 1.5,  
210 <https://github.com/MikeAxtell/bam2wig>). To evaluate the alignments, we first calculated the  
211 aligned read length by adding the number of M and I characters in the CIGAR string<sup>13</sup>. Based on  
212 this, the mapping identity was defined as  $(1 - \text{NM} / \text{aligned\_reads}) * 100$ , where NM is the edit  
213 distance reported taken from `minimap2`. Read basecalling and mapping metrics can be found in  
214 Supplementary Table 1.



215

216 *Gene expression analysis*

217 For transcript abundance estimation we applied featureCounts (Rsubread 1.32.4) allowing that a  
218 read can be assigned to more than one feature (allowMultiOverlap = TRUE) and applying the  
219 setting for long reads (isLongRead = TRUE)<sup>42</sup>. Calculations were performed based on the genome  
220 coordinates of genomic feature types (tRNA, rRNA, protein-coding genes). For the abundance  
221 comparison to Illumina-sequencing, we applied a regularized log transformation from the DESeq2  
222 package that transforms counts on a log<sub>2</sub> scale, normalizing for the library size and minimizing  
223 differences between samples with small counts<sup>43</sup> (raw count data for TEX samples in  
224 Supplementary Table 2).

225

226 *Poly(A) tail analysis*

227 Poly(A) tail length was estimated by nanopolish following the recommended workflow (Version  
228 0.10.2, [https://nanopolish.readthedocs.io/en/latest/quickstart\\_polya.html](https://nanopolish.readthedocs.io/en/latest/quickstart_polya.html))<sup>44</sup>.

229

230 *Detection of transcriptional units and annotation of transcription start sites and transcription*  
231 *termination sites*

232 The definition of transcriptional units (TU) and our strategy to detect and annotate them was  
233 based on a recent study that re-defined the bioinformatical search for transcriptional units (TU)<sup>29</sup>.  
234 The TU annotation was performed in a two-step process in the following way: First, TU clusters  
235 were defined by collapsing all reads that overlap and fulfill certain criteria that are commented on  
236 extensively in the available code for this study  
237 ([https://github.com/felixgrunberger/Native\\_RNAseq\\_Microbes](https://github.com/felixgrunberger/Native_RNAseq_Microbes)). In short, reads were filtered out  
238 that did not align protein-coding genes (CDS) or tRNAs, had a mapping identity below 80%, were  
239 spliced, were shorter than 50% of the gene body and did not cover either the 5' or the 3'  
240 untranslated region. The remaining overlapping reads were collapsed in a strand-specific manner  
241 and merged.

242 Finally, the collapsed reads that represent the TU cluster, were split according to the coverage drop  
243 at the 3' region of a gene. This was achieved by calculating the sequencing depth in a window of  
244 20 nt upstream and downstream of the corresponding TTS and applying a deliberately low

245 threshold of 1.5x (higher coverage upstream compared to downstream, see transcriptional unit  
246 table in Supplementary Table 5).

247 TSS were predicted by calculating the median start position of all reads that map to one gene and  
248 cover the 5' part of a CDS. To address the 3' coverage bias and the underrepresentation of reads  
249 that map to the 5' end and also for the 12 missing nucleotides at the TSS in general, all reads starting  
250 at least 20 nt downstream of the annotated gene start were included. To not exclude too many  
251 reads, the position of TTS were predicted similarly, by also including reads that have end positions  
252 starting from 20 nt upstream of a gene end (TSS table in Supplementary Table 3, TTS table in  
253 Supplementary Table 4).

254 For the analysis of prokaryotic promoter elements, the sequences from 58 bases to 11 bases  
255 upstream of all uncorrected TSS that are starting a TU were extracted, to identify relevant motifs  
256 using MEME with default options except for a custom background file, calculated from intergenic  
257 sequences of the respective organism<sup>45</sup>. The analysis of terminator sequences was performed  
258 comparably by extracting all TTS that are located at the end of a TU and searching for terminators  
259 in a sequence window from -45 to +45 from the TTS using MEME and the custom background  
260 model. Heatmap analysis of motif positioning was performed by importing MEME FASTA  
261 information into R. Metaplots of the nucleotide enrichment analysis (compare<sup>26,46</sup>) were calculated  
262 by comparing the genomic sequences surrounding a TTS in a window from -45 to 45 to randomly  
263 selected intergenic positions (subsampling, n = 10000).

#### 264 *Modified base detection*

265 The performance of two different approaches (Tombo vs. error and basecalling properties) for the  
266 detection of modified bases was evaluated:

267 (1) We used Tombo (Version 1.5, <https://nanoporetech.github.io/tombo>) to identify modified  
268 bases based on a comparison to a theoretical distribution (*de novo* model) and based on the  
269 comparison to a reference data set (sample-compare model)<sup>47</sup>. Briefly, for Fig. 6a reads mapping  
270 to 16S rRNA were preprocessed, resquiggled and the raw signal plotted at a specific genomic  
271 coordinate using the respective plotting command (tombo plot genome\_locations). In addition, the  
272 probability of modified bases was calculated using the detect\_modification de\_novo command. For  
273 Fig. 6b the signals were calculated for both samples (wildtype and deletion mutant) and compared  
274 using the *control-fast5-basedirs* and *overplot Boxplot* option. For Fig 6c a reference data set was

275 created by sorting the reads mapping to the 16S rRNA based on the position of the read start  
276 (before or after gene start), thereby dividing the data set in reads that belong to mature and  
277 unprocessed 16S rRNAs. The two read sets were used as input for the sample-compare method.  
278 The two different models (*de novo* and sample-compare using non-mature 16S reads as a reference  
279 set) were applied to the complete 16S, base-modification-probabilities extracted from the tomo  
280 output and plotted using a custom R script.

281 (2) For calculating the frequency of correct, deleted and wrong nucleotides at a genomic position  
282 the function `pileup` from the `Rsamtools` package was used (<https://rdrr.io/bioc/Rsamtools/>).  
283 Plots were generated using custom R scripts. The results were compared to known modification  
284 sites in 16S rRNA for *Escherichia coli*<sup>48</sup> and *Haloferax volcanii*<sup>49</sup>. Given the high degree of  
285 conservation of the modifying enzymes in archaea and because there was no reference set  
286 available for *Pyrococcus furiosus*, the results were compared to the five modified positions that are  
287 described for *H. volcanii* (910, 1352, 1432, 1450/1451 correspond to 938, 1379,1469,1486/1487  
288 in *P. furiosus*).

289

## 290 **Public data**

291 In addition to the in-house generated data, we made use of other published sequencing data sets  
292 and data repositories that are described in the following.

293

### 294 *Transcriptional start sites*

295 For all three model organisms, global transcriptional start sites were mapped recently using  
296 differential RNA sequencing<sup>27,30,31</sup>. Position data were extracted from the Supplementary data of  
297 the publications and compared with the TSS described in the ONT data sets given that a start site  
298 was found in both data sets.

299

### 300 *Transcriptional termination sites*

301 So far there are no transcription termination data sets available for *H. volcanii* and *P. furiosus*. The  
302 3' UTR lengths of the *E. coli* ONT set were compared to TTS predicted based on the Term-Seq  
303 method<sup>26</sup>

304

305 *Transcriptional units*

306 The widely used database DOOR2<sup>50</sup> was used to compare the TU annotation for both archaeal sets.

307 For *E. coli* a more recent, but also purely bioinformatical prediction, served as a reference set<sup>29</sup>.

308

309 *Gene expression comparison*

310 For *P. furiosus* gene abundances from ONT data were compared to fragmented RNA sequencing

311 data of mixed growth conditions (conditions, library, sequencing, mapping described in<sup>31</sup>), by

312 applying a regularized log transformation as described earlier<sup>43</sup>. For *H. volcanii* comparison, raw

313 reads of a mixed RNA sequencing were extracted from the SRA (SRR7811297)<sup>28</sup> trimmed using

314 trimmomatic<sup>51</sup>, (leading:20, trailing:20, slidingwindow:4:20, minlen:12), mapped to the reference

315 genome using bowtie2 (-N 0, -L 26)<sup>52</sup>, converted to sorted bam files using samtools<sup>41</sup> and compared

316 to ONT data as described for *P. furiosus*. Illumina RNA sequencing data for *E. coli* were also

317 extracted from the NCBI (SRP056485, 37°C LB), analysed as described for *H. volcanii* Illumina data

318 and also compared to the ONT reference data.

## 319 **Results**

### 320 **Library preparation for Nanopore native RNA sequencing of bacterial and archaeal transcriptomes**

321 We performed whole-genome native RNA sequencing using the Nanopore sequencing technology  
322 (referred to as Nanopore native RNA sequencing in this work) that can be applied to any  
323 prokaryotic organism. The key steps of the library preparation are shown in Fig. 1a: after  
324 enzymatic polyadenylation, the RNA is reverse transcribed to increase sequencing throughput  
325 (recommended by ONT)<sup>16</sup>. Subsequently, a motor protein is added that feeds the RNA into the  
326 Nanopore. Following this workflow, native RNAs from prokaryotic organisms can be sequenced.  
327 Depending on the necessary sequencing depth, the libraries were barcoded using poreplex  
328 (<https://github.com/hyeshik/poreplex>), since this is not yet supported by the official kits and  
329 protocols from Oxford Nanopore. To identify primary and processed sites in both mRNA and rRNA,  
330 we partially digested 5'-monophosphorylated transcripts using the terminator exonuclease (TEX)  
331 and compared them to non-treated samples (see Supplementary Fig. 1a). In contrast to many  
332 Illumina sequencing-based approaches that make use of a specialised library preparation design  
333 to tackle a well-defined question<sup>8</sup>, we evaluated the potential of native RNA sequencing to analyse  
334 multiple transcriptomic features simultaneously including the identification of *cis*-regulatory  
335 elements that govern transcription, the analysis of operon structures and transcriptional  
336 boundaries, rRNA processing and 16S rRNA modification patterns (see Supplementary Fig. 1b).

337

### 338 **Sequencing yield and quality control of raw Nanopore reads**

339 Native RNA sequencing was performed for three prokaryotic organisms: the bacterial model  
340 organism *Escherichia coli*, the halophilic archaeon *Haloferax volcanii* and the hyperthermophilic  
341 archaeon *Pyrococcus furiosus*. In order to show that native RNA sequencing can be applied to a  
342 wide variety of prokaryotic organisms, we specifically chose (i) organisms from the bacterial and  
343 archaeal domain of life with *P. furiosus* and *H. volcanii* belonging to the Euryarchaeota, (ii)  
344 organisms that are classified as mesophilic (*E. coli*, *H. volcanii*), hyperthermophilic (*P. furiosus*), or  
345 halophilic organism (*H. volcanii*) and (iii) organisms that differ significantly in their GC-content (*E.*  
346 *coli*: 50.8%<sup>53</sup>, *H. volcanii*: 65%<sup>39</sup>, *P. furiosus*: 40.8%<sup>31</sup>). The prepared libraries were sequenced on a

347 MinION device and reads were collected over 48 hours on R9.4 flow cells (see Supplementary Fig.  
348 2a). The total number of reads in the TEX-treated libraries were sufficient to achieve good  
349 coverage of the transcriptome (*E. coli*: 9.2x, *P. furiosus*: 15.0x, *H. volcanii*: 10.3x, see Supplementary  
350 Table 1) to perform transcriptional unit annotation and accurate determination of transcript  
351 boundaries. Before mapping the reads to the reference genomes, the quality of the sequencing runs  
352 was evaluated based on raw read length distribution and quality of reads estimated by Guppy (see  
353 Supplementary Fig. 2b,c). To verify that no problems occurred during sequencing or library  
354 preparation a poly-adenylated spike-in control (yeast enolase) was used. The control showed a  
355 uniform length distribution (median lengths between 1212 and 1306 nucleotides) and a very good  
356 read quality (median quality between 10.8 and 12.2) in all samples, therefore, excluding any bias  
357 (see Supplementary Fig. 2b,c, Supplementary Table 1). Due to large differences in the composition  
358 of the RNAs used to train the basecaller and the sequenced reads, that contain mostly ribosomal  
359 RNAs known to harbor base modifications, the overall quality is lower than for the spike-in control  
360 in every data set<sup>54</sup>. To prevent useful reads from being discarded, we decided to also include reads  
361 that fall below the standard quality score threshold of 7 and continued with the mapping of the  
362 reads to the reference genomes<sup>13</sup>.

363

#### 364 **Analysis of mapped reads**

365 An advantage of the long-read Nanopore sequencing technique is that native RNA strands can be  
366 sequenced directly as near full-length transcripts<sup>55</sup>. This is also reflected in the sequenced data  
367 sets as aligned lengths up to 7864 nt can be observed (see *H. volcanii* NOTEX sample with a median  
368 read length of 1390 nt, Supplementary Fig. 3c). The majority of reads from *E. coli* and *H. volcanii*  
369 samples mapped to the 23S rRNA (Fig. 1b, see Supplementary Fig. 3a). In general, the read identity  
370 of CDS-mapping reads is higher than for rRNA mapping reads, but lower than the spike-in control  
371 (see Supplementary Fig. 3b,c). It is noteworthy, that a minimum aligned length of about 100 nt  
372 appears in the data sets (see Supplementary Fig. 3d) when using the native RNA sequencing  
373 protocol and minimap2 as mapping tool<sup>16,40,56</sup>. Unaligned reads had a median read length of 191  
374 nt, in contrast to 572 nt for aligned reads (all data sets combined) suggesting that short reads could  
375 not be aligned properly. As small RNAs, CRISPR-RNAs or tRNAs fall below this threshold, we

376 excluded these RNAs from further analysis. While short transcripts are a problem, longer RNAs are  
377 sequenced without loss in quality (see Supplementary Fig. 3e). As the raw read quality correlates  
378 with the mapping identity of the reads, problems during sequencing can be live-monitored in  
379 MinKNOW and the run can be canceled allowing the loading of a new library (see Supplementary  
380 Fig. 3f). Since the subsequent analysis of transcriptional units is heavily dependent on the integrity  
381 of the data, we verified the data integrity in the next steps. Sources for bias could emerge (i) from  
382 the poly(A)-tailing efficiency that might differ between transcripts and (ii) from the loss of certain  
383 transcripts during library preparation or sequencing problems. Comparing the initial amount of  
384 RNA with the reverse transcribed DNA, we observed that the enzymatic addition of a 3' poly(A)-  
385 tail is not very efficient (~10%). In general, the addition of poly(A)<sub>20</sub> (length of the reverse  
386 transcription adapter) is sufficient to allow for the annealing of the poly(T)-adapter required for  
387 reverse transcription and sequencing. This goes in line with the shortest median length we  
388 observed for the 5S rRNA (see *E. coli* TEX sample) (see Supplementary Fig. 4). For most of the  
389 transcripts, a tail with 50 to 100 nt was detected. The overall correlation of transcript abundances  
390 calculated from sequencing data using Nanopore or Illumina technology was very high given that  
391 only mixed conditions could be compared in the case of *H. volcanii* and *P. furiosus* (see  
392 Supplementary Fig. 5a,b,c, transcript abundance data for TEX samples in Supplementary Table 2).  
393

#### 394 **Mapping of transcriptional boundaries**

##### 395 *Transcription start sites*

396 Transcription start site (TSS) and transcription termination site (TTS) detection was based on the  
397 determination of transcriptional units (TU) (compare material and methods section)<sup>29</sup>. In total, we  
398 found substantial overlap between TTS detected by Illumina d(ifferential) RNA-seq<sup>2-4</sup> and  
399 Nanopore native RNA-seq (Fig. 2a)(positions of TSS derived from ONT TEX-treated samples in  
400 Supplementary Table 3). The portion of ONT only and Illumina only is mostly caused by the  
401 different algorithms used and the limited sequencing depth in the ONT data sets. Strikingly, the  
402 median 5' untranslated region (UTR) lengths were very similar when data from ONT native and  
403 Illumina-based RNA sequencing were compared (*E. coli*: 68 ONT vs. 62 Illumina; *P. furiosus*: 23  
404 ONT vs. 13 Illumina; *H. volcanii*: 1 ONT vs. 0 Illumina). Please note that TSS-mapping based on

405 Nanopore native RNA-seq data must be corrected by 12 nucleotides (Fig. 2b). It has been observed  
406 previously that about 12 nt are missing at the 5'-end of the sequenced RNAs. This observation can  
407 be explained by a lack of control of the RNA translocation speed after the motor protein falls off  
408 the 5' end of the RNA (see Supplementary Figure 6a)<sup>56,57</sup>. Promoter analysis confirmed the  
409 presence of well-known sequence motifs of bacterial and archaeal promoters<sup>27,31,58</sup>. This includes  
410 the TATA-box and B-recognition element (BRE) characteristic for archaeal promoters and the -10  
411 element in bacterial promoters (Fig. 2d). The -35 element in *E. coli* has been previously shown to  
412 be less enriched compared to the -10 site<sup>5</sup>, which might explain why this element cannot be  
413 detected in the Nanopore data set. To analyse TSSs in more detail, we compared the 5' UTR lengths  
414 for all genes with predicted TSS in ONT and Illumina data sets (see Supplementary Figure 6b,c,d).  
415 The overall correlation between the two techniques was very high (see Supplementary Fig. 6). As  
416 expected, the correlation improves with increasing sequencing depth for a gene (>5 reads). While  
417 TEX-treatment is a common way of predicting TSS in Illumina sequencing, we observed that it is  
418 not necessary for ONT data as very similar TSS are found in both TEX and NOTEX data sets ( $\rho =$   
419 0.86) (see Supplementary Figure 6e).

420

#### 421 *Transcription termination sites*

422 Native RNA reads are sequenced in the 3' to 5' direction, which is a major advantage in the  
423 detection of termination sites as any bias introduced after polyadenylation can be excluded.  
424 Currently, no reference data sets for the archaeal organisms were available, the distribution of 3'  
425 untranslated regions (3'UTRs) in *E. coli* ONT data closely resembles the data from a previous Term-  
426 seq study<sup>26</sup>. Untranslated regions at the 3' end of an annotated transcript are longer and more  
427 uniformly distributed in *E. coli* than in the two archaeal species (Fig. 2c). In total, 1321 TTS in *E.*  
428 *coli*, 856 in *P. furiosus* and 1461 in *H. volcanii* were analysed (positions of TTS in TEX-treated  
429 samples in Supplementary Table 4). A meta-analysis of all TTS surrounding regions revealed  
430 different sequence-dependent termination mechanisms that were confirmed using motif scanning  
431 (Fig. 2e, see Supplementary Fig. 7a-d). Our data suggest that transcription in *P. furiosus* is  
432 terminated by a double-stretch of Uridines that are distributed over a length of 22 nt, a finding that  
433 is in line with the terminator sequences detected by Term-Seq in *S. acidocaldarius*<sup>46</sup> and similar to



434 the U<sub>(8)</sub> sequence in *Thermococcus kodakarensis* by an *in vivo* reporter assays<sup>59</sup>. The termination  
435 motif found in *H. volcanii* is a (U)<sub>4</sub>-sequence and located right before the TTS (see Supplementary  
436 Fig. 7d). The motif locations for both *Haloferax* and *Pyrococcus* ONT sets suggest that accurate TTS  
437 detection of transcripts terminated by poly(U) stretches is currently not possible. We observed  
438 that homopolymer sequences are removed during trimming of the reads, which leads to TTS  
439 positions that are positioned upstream of the poly(U) signal. Analysing individual transcripts in *H.*  
440 *volcanii* and *P. furiosus*, we found that a single transcript can exhibit diverse 3' ends. This is true  
441 for the Pilin transcript in *H. volcanii* and the Alba transcript in *P. furiosus*, respectively  
442 (Supplementary Fig. 8). Both genes are highly expressed and some transcripts carry extended 3'  
443 UTRs. While the majority of transcripts are terminating at the first poly(U) stretch, a subset of  
444 transcripts is substantially longer and terminates at a second poly(U) termination signal  
445 (Supplementary Figure 8). Interestingly, homogeneous short poly(U) signals are found both at the  
446 canonical termination site and the termination site of the elongated 3'UTR in the case of the Pilin  
447 transcript in *H. volcanii*. In contrast, the Alba gene transcripts in *P. furiosus* are terminated at both  
448 sites via long consecutive poly(U) stretches. Surveying the heterogeneity of the transcripts with an  
449 extended 3'UTR, we found a heterogeneous distribution in the length of the transcripts, which  
450 possibly indicates a step-wise trimming of the 3'UTR to yield the mature RNAs.

451 As observed for *E. coli* termination sequences, Cytosines are enriched over Guanosine adjacent to  
452 the TTS in *P. furiosus* (Fig. 2e). Termination motifs detected in the *E. coli* data set cover both  
453 intrinsic (poly(U)) and Rho-dependent termination signatures (see Supplementary Fig. 7a,b)<sup>26</sup>. We  
454 classified the stem-loop forming motif as Rho-dependent signatures, as these were not enriched in  
455 the poly(U) terminated genes. However, the stem-loops could potentially also represent  
456 processing or pause sites.

457

#### 458 **Annotation of large transcriptional units**

459 Long-read sequencing of native full-length RNAs has the potential to improve and facilitate  
460 genome-wide transcriptional unit (TU) annotation, which can be visually explored in a genome  
461 browser coverage track (Fig. 3a). For whole-genome analysis, the annotation strategy was based  
462 on two major observations: First, during RNA preparation, RNA processing or degradation can

463 occur, which limits the probability of sequencing an RNA in its native form as the percentage of  
464 full-length transcripts decreases with expected gene size (see Supplementary Fig. 9a). Secondly,  
465 we detected a decrease in coverage from the 3' to 5' end of the RNA in all RNA classes except for  
466 the spike-in control (see Supplementary Fig. 9b), which is a limitation reported in the  
467 literature<sup>13,60,61</sup>. Therefore, we assume that not Nanopore sequencing but library preparation  
468 causes this problem. Based on this information, we developed a strategy that first collapses all  
469 overlapping reads and then splits them according to a significant coverage drop on the 3' ends  
470 (annotation of TUs based on this strategy in Supplementary Table 5). We compared the results to  
471 database annotations and found that most of the differences are either caused by the low  
472 sequencing depth or by single-unit operons that have been collapsed and are now two-unit  
473 operons in the ONT data sets (see Supplementary Fig. 10a,b)<sup>29,50</sup>. Even though limited read  
474 availability is a concern in all data sets, many large operons were detected for all organisms (see  
475 Supplementary Fig. 10c). In case of limited bioinformatical resources, TUs can be explored visually  
476 in a genome browser, which is mostly not possible for Illumina reads (Fig. 3, see Supplementary  
477 Fig. 11,12). It further allows a quantitative analysis of individual transcripts in relation to other  
478 elements of the TU and performs much better than pure bioinformatical prediction or molecular  
479 biology methods (RT-PCR) as shown for the archaellum operon in *P. furiosus* (Fig. 3)<sup>50,62</sup>. Here, it  
480 was possible to (i) detect multiple transcription units forming this cluster, (ii) confirm  
481 transcriptional start sites and (iii) to confirm that flaB0, the protein that is referred to as the major  
482 archaellin in *P. furiosus*<sup>2,6</sup>, is transcribed in large excess over the other archaellum genes. The  
483 largest TU cluster in *H. volcanii* consists of 25 ribosomal protein genes. Based on the native RNA-  
484 seq data, the analysis shows that this operon is split into two transcription units. This shows that  
485 the ONT native RNA sequencing method provides the opportunity to correctly annotate  
486 transcriptional units thereby outperforming the bioinformatics-only prediction as well as the  
487 visual inspection of Illumina coverage (see Supplementary Fig. 11). Besides, we confirmed the  
488 complex transcription pattern of the major ribosomal protein gene cluster in *E. coli* that stretches  
489 over more than 10 kB, including the accurate determination of TSS and TTS and a putative cleavage  
490 site in the *secY* gene (see Supplementary Fig. 12)<sup>63</sup>.

491 **Detection and confirmation of rRNA processing in *E. coli***

492 Next, we aimed to analyse the multi-step rRNA processing pathway which is the major RNA  
493 maturation pathway in any prokaryotic cell. We first focus on the *E. coli* data set as the processing  
494 of bacterial rRNAs is well characterized<sup>64-66</sup>. Ribosomal RNA in *E. coli* is transcribed from 7  
495 independent rDNA operons, containing the mature rRNAs (16S, 23S and 5S rRNAs) and some  
496 tRNAs which are intersped by RNA spacers elements<sup>67</sup>. In agreement with a previous study,  
497 transcription of *rrnC* from two promoters (transcription start sites at -293 and -175) was detected  
498 accurately (Fig. 4a,b)<sup>68</sup>.

499 The rRNA maturation process, which requires the action of well-defined ribonuclease activities,  
500 culminates by the formation of stoichiometric amounts of mature 16S, 23S, and 5S rRNAs<sup>64-66</sup>.  
501 Unexpectedly, the sequencing efficiency of mature 16S rRNA was lower than the 23S rRNA (Fig.  
502 4a). Moreover, although we could properly detect RNA of similar size or longer (see above), the  
503 short-lived full rDNA operon transcript detected in RNase III deficient strain<sup>69</sup>, is not observed  
504 using our experimental set-up. In contrast, the downstream pre-rRNAs which are generated by the  
505 action of RNase III were detected (Fig.4). Among these intermediates, the 17S pre-rRNA with 115  
506 additional nt at the 5' end and 33 nt at the 3' end of the 16S rRNA, was identified (Fig. 4b).  
507 Additional 16S rRNA processing sites (RNase E: -66, RNase G: 0 5' mature) are also detected (Fig.  
508 4 b,c). Recent studies were suggesting that the 3' end of the mature 16S rRNA is generated by 3'-5'  
509 ribonucleases activity and/or endonucleolytic cleavage<sup>70,71</sup>. In addition to the mature 16S rRNA  
510 3' end, we could observe reads of decreasing length spanning from +33 nt (RNaseIII) to 0 (related  
511 to 16S rRNA 3' end), that could account for 3'-5' exonuclease processing activity (or degradation  
512 during sample preparation). Together we could accurately identify all the known processing sites  
513 at nucleotide resolution in wildtype *E. coli*.

514

515 **Insights into archaeal ribosomal RNA processing**

516 In comparison to bacteria or eukaryotes, ribosomal RNA processing in archaea is still poorly  
517 understood<sup>70,72-74</sup>. Our current knowledge suggests that the primary polycistronic rRNA precursor  
518 contains processing stems formed by the 5'-leader and 3'-trailer sequences surrounding the 16S  
519 and 23S rRNAs<sup>72,73,75,76</sup>. In Euryarchaeota, the 16S and 23S rRNAs are additionally separated by the

520 presence of an internal tRNA. In most archaea, the 16S and 23S rRNA processing stems contain a  
521 bulge-helix-bulge motif which is, in the context of intron-containing tRNA, recognized by the  
522 splicing endonuclease endA<sup>75-77</sup>. Similar to intron-containing tRNA maturation, processing at the  
523 bulge-helix-bulge motifs results in the ligation of the resulting extremities, thereby generating the  
524 archaeal specific circular pre-16S and circular pre-23S rRNAs<sup>73,76,78,79</sup>. The molecular mechanisms  
525 by which the circular pre-rRNA intermediates are further processed into linear mature rRNA are  
526 unknown<sup>73,76</sup>.

527 By analysing single reads, we aimed to confirm and expand our knowledge on the poorly  
528 characterized multi-step ribosomal maturation process in *P. furiosus* and *H. volcanii* (Fig. 5a,b,c,  
529 see Supplementary Fig. 13a,b)<sup>49,73,75,80</sup>. Due to a more limited number of reads in the multiplexed  
530 *H. volcanii* samples, we have mostly focused on the *P. furiosus* dataset. As expected, almost all reads  
531 are categorized as fully matured transcripts of the single 16S/23S rRNA cluster that do not  
532 contain an extended 5' or 3' region (see Supplementary Fig. 13c). Surprisingly, 5' and 3' end  
533 positions did not precisely match the available annotations at NCBI  
534 (<https://www.ncbi.nlm.nih.gov/genome/>) or the archaeal genome browser (AGB,  
535 <http://archaea.ucsc.edu>). In contrast, these mature rRNA extremities did match our independent  
536 experimental validations by primer extension analysis of the 5' ends of the 16S and 23S rRNAs of  
537 *H. volcanii* (Supplementary Fig. 15f). In addition, the majority of the expected processing sites,  
538 notably at the predicted or known bulge-helix-bulge motifs<sup>78</sup>, were faithfully observed in *P.*  
539 *furiosus* and *H. volcanii* (see Supplementary Fig. 14,15).

540 Despite the high sequencing depth of the (pre-)rRNA, we did not detect a full-length precursor  
541 consisting of the 16S leading-16S-tRNA-23S- 23S trailing elements in *P. furiosus* and *H. volcanii*,  
542 suggesting that early rRNA processing occurs rapidly in these cells. The remaining reads were  
543 grouped according to their 5' leading and 3' trailing lengths into five additional categories that are  
544 less abundant (with less than 1600 counts in each group): (1) a processing variant that entails the  
545 16S rRNA leading/trailing sequence-tRNA-23S rRNA leading/trailing sequence, (2) probably  
546 fragmented full-length precursor rRNAs, (3) 16S rRNA leading/trailing sequence-tRNA, (4) 16S  
547 rRNA leading/trailing sequence-tRNA-23S rRNA and (5) tRNA-23S rRNA (Fig. 5, see  
548 Supplementary Fig. 13). The early 16S rRNA leading/trailing sequence-tRNA-23S rRNA trailing  
549 sequence precursor (1) or 16S rRNA leading/trailing sequence (3) generated by cleavage and

550 reciprocal ligation of the pre-16S and pre-23S rRNAs at the predicted bulge-helix-bulge motifs  
551 were detected very accurately, and are reminiscent of previous observations<sup>76</sup> (Fig. 5, see  
552 Supplementary Fig. 13d). Given the number of reads, the direction of ONT sequencing from 3' to  
553 5' and the accurate mapping, it is unlikely that the additional putative rRNA precursors (variants  
554 4, 5) carrying the leading sequence in combination with 23S rRNA and tRNA-23S rRNA are all  
555 arising from experimental artifact (Fig. 5a,b) (see also Discussion). This processing variation could  
556 have been overlooked in the past in the analysed archaea, as these are only minor fractions of the  
557 transcripts present in the cell or are specific to *P. furiosus*. Shortened 23S rRNA reads (variants 4,  
558 5) and the overall visible 3' to 5' coverage drop can most likely be explained by fragmentation and  
559 degradation during library preparation, secondary structures that prevent efficient loading into  
560 the nanopore or truncation of RNA reads caused by physical artifacts that have been described  
561 before and include problems during RNA translocation or disruptions of the ionic current  
562 signal<sup>13,52,56</sup>. Furthermore, it cannot be excluded that non-mature reads are categorized as  
563 fragmented reads and will be assigned as mature 16S or 23S rRNA.

564 Highly enriched positions that differ from the annotation of the mature rRNAs and cannot be  
565 assigned to a processing site may represent a wrong annotation of the rRNA locus or currently  
566 unknown processing sites in the two archaeal species<sup>31,39</sup>. To provide further examples that show  
567 the potential to describe maturation and processing events for prokaryotic rRNA, we sequenced  
568 an *H. volcanii* wildtype strain grown under low salt conditions (see Supplementary Fig. 15b,c)<sup>28</sup>.  
569 Under these conditions, a 16S rRNA precursor with an extended 5'UTR (position -121 – 5'bulge)  
570 appears that is only enriched in this condition. Quantification by comparison with the NOTEX  
571 wildtype set confirms the previous detection of this rRNA variant in a gel-electrophoretic analysis  
572 of the rRNA (see Supplementary Fig. 15b)<sup>28</sup>.

573

#### 574 **Towards mapping of RNA base modifications**

575 More than 160 types of modified bases have been described in RNAs so far<sup>48</sup>. In contrast to other  
576 sequencing techniques, Nanopore-based sequencing offers the possibility to detect base  
577 modifications directly, as these modifications lead to an electric current signal that differs from the  
578 expected theoretical distribution obtained by the unmodified nucleotides sequence<sup>14,15,20,81</sup>. Based

579 on this approach, we benchmarked the potential to detect known modification sites in 16S rRNA.  
580 Before expanding the analysis to the full-length mature rRNA, we focused on the dimethylation  
581 (m<sup>6</sup>2A) introduced by the enzyme KsgA at position 1450/1451 in *H. volcanii*<sup>49,82</sup>. Using the *de novo*  
582 model in Tombo, a suite of tools for the identification of modified nucleotides from nanopore  
583 sequencing data (updated version from Stoiber et al.<sup>47</sup>), the calculated probability of a modification  
584 was very high for the stretch of Guanosines adjacent to position 1450 (Fig. 6a). Mapping to single-  
585 nucleotide resolution is difficult as more than one base contributes to the actual electric current  
586 signal in the nanopore<sup>83</sup>. In the next step, a comparison of a wildtype sample to a deletion mutant  
587 of KsgA confirmed the absence of the dimethylation in the deletion strain and confirmed that the  
588 m<sup>6</sup>2A modifications and not the homopolymer-G-stretch are responsible for the altered current  
589 signal (Fig. 6b). The analysis further revealed a reduced signal variability at non-modified  
590 positions between the two samples in comparison to the theoretical distribution, which leads to  
591 less false positives in the statistical analysis. As the *de novo* model has a higher error rate  
592 compared to the sample-compare model, we generated two read sets by sorting full-length 16S  
593 rRNA transcripts according to their 5' leading length to mature (n: 2744) and pre-rRNAs (n: 102)  
594 in the *Haloflex* wildtype data set (Fig. 6c). The calculated base modification probabilities and  
595 electric current signal distributions for this model are very similar to the wildtype/ $\Delta$ ksgA set,  
596 indicating that the two m<sup>6</sup>2A modifications were not quantitatively introduced in the pre-16S-  
597 rRNA reads (Fig. 6d). This finding is in line with a proposed "quality control" function of KsgA  
598 during late biogenesis of the small ribosomal subunit<sup>84-86</sup> and further highlights the potential to  
599 detect the introduction of base modifications at a different stage of rRNA maturation.

600 Next, we applied the described *de novo* and sample-compare model to the full 16S rRNA of all three  
601 organisms and compared the results to positions known from literature<sup>48,49</sup>. Applying a probability  
602 threshold of 0.5, we found that 60% (*de novo*) and 1.89% (sample-compare, 28 bases) of the bases  
603 in the 16S rRNA are modified in *H. volcanii* (Fig. 6e), which emphasizes the better performance of  
604 the sample-compare model by the vastly reduced number of false-positively detected RNA  
605 modifications. 10 of the 28 predicted bases (please note that approximately five bases contribute  
606 to the signal in the nanopore and that a base single modification therefore influences the current  
607 signal at the surrounding bases as well) can be assigned to known base modifications at positions  
608 910, 1430 and 1450/1451<sup>49</sup>. Using the same threshold for *E. coli* (*de novo*: 50.5%, sample-compare:

609 0.1%, Fig. 6f) and *P. furiosus* (*de novo*: 64.9 %, sample-compare: 17.7 %, Fig. 6g), better accuracy  
610 of the sample-compare model could be confirmed. Moreover, these data support the long-standing  
611 hypothesis that hyperthermophilic organisms might stabilize their rRNAs by a higher degree of  
612 RNA modifications<sup>87,88</sup>.

613 It is noteworthy that the predicted large number of modifications lead to a loss in read quality. This  
614 is for example seen when analysing the *Pyrococcus* data set, as the quality score is also based on  
615 the comparison of detected to theoretical read signal (compare Supplementary Fig. 3c). To look at  
616 this observation in more detail, we compared the results from the raw squiggle Tombo approach  
617 that is not dependent on mapping of the reads to the mapping properties of the reads. This  
618 methodology is based on an approach that was recently used to identify m<sup>6</sup>A RNA modifications  
619 from native RNA reads with an accuracy of ~90%<sup>14</sup>. After mapping, the frequency for the  
620 respective nucleotide at every position in the 16S rRNA to be correct, wrong or deleted was  
621 calculated. Homopolymer stretches in the RNA increase the likelihood that the correct number of  
622 nucleotides is not correctly identified and this, in turn, leads to an increased number of deleted  
623 nucleotides, which is also visible in the *Haloferax* data sets at the G-stretch adjacent to the m<sup>6</sup>A  
624 modifications (Supplementary Fig. 16a,b). The overall frequency of wrongly assigned and deleted  
625 nucleotides was much higher in *P. furiosus* (16.4%) than in *E. coli* (10.7%) and *H. volcanii* (10.4%)  
626 (Supplementary Fig. 16c). Interrogating the full-length 16S rRNA, we found that miscalled  
627 positions are equally distributed among the whole transcript (Supplementary Fig. 16d,e,f).  
628 Statistical analysis of miscall-frequencies revealed a significant difference between already known  
629 modification sites and non-modified positions in *Haloferax* and *Escherichia* suggesting that even a  
630 very simple model can detect RNA base modifications when wrongly assigned bases considered.  
631 The situation is different for *Pyrococcus*: Native Nanopore data suggest that the rRNA is heavily  
632 modified. However, the number, exact positions and chemical identity of these modifications are  
633 currently unknown. Hence, an analysis of how often base modifications lead to wrongly identified  
634 nucleotides in the 16S rRNA sequence cannot be performed (Supplementary Fig. 16c,g).

635

636



637 **Discussion**

638 Performing whole-genome native RNA-seq study in prokaryotes provided us with a wealth of  
639 information on transcriptional and post-transcriptional processes in *E. coli* and the archaeal model  
640 organisms *H. volcanii* and *P. furiosus*. Here, we will mostly discuss new biological insights that  
641 emerged from our study. Additionally, we will reflect on the advantages and disadvantages of  
642 Nanopore native RNA-seq.

643 **Insights into transcriptional processes**

644 Bacterial and archaeal transcription is an intensely studied molecular process and the mechanisms  
645 of basal transcription are well understood<sup>89</sup>. Native RNA sequencing allowed us to retrieve  
646 accurate information of transcript boundaries on both 5' and 3' ends. Our data show that 3' UTRs  
647 length distributions are comparable between *E. coli*, *P. furiosus* and *H. volcanii* with the majority of  
648 mRNAs showing a length between 30 -70 nt. Similar to bacteria, archaea encode large numbers of  
649 small non-coding RNAs<sup>90</sup>. However, many regulatory events that involve the regulation via small  
650 RNAs take place at bacterial 5' UTRs<sup>91</sup>. We and others found that 5' UTRs are significantly shorter  
651 in archaea supporting the idea that post-transcriptional regulation is mediated via the 3' rather  
652 than the 5' UTR in archaea<sup>92</sup>. Additionally, we determined transcription termination sites, which  
653 are well analysed for bacterial species but only a few studies focused on archaeal termination  
654 mechanisms, especially on the genome-wide level. In both archaeal species, poly(U) stretches were  
655 overrepresented at termination sites agreeing well with termination sequences found in *Sulfolobus*  
656 and *Methanosarcina*<sup>46</sup>. Interestingly, the majority of TTS found in *Pyrococcus* transcripts is  
657 composed of two U-stretches with at least five consecutive uridine bases while a subclass of  
658 *Haloferax* transcripts is almost exclusively terminated by a single U-stretch with four uridine  
659 bases. It has been shown that a five base U-stretch is sufficient to induce termination *in vitro*<sup>59,93,94</sup>.  
660 Similar observations were described in a recent study by Berkemer et al, which identified a  
661 poly(U)<sub>4</sub> stretch to be the termination signal in intergenic regions<sup>95</sup>. However, the current data set  
662 suggests that this short termination signal might be a specific feature for a subclass of *Haloferax*  
663 transcripts resembling the poly(U) termination motif found in *E. coli*. All other archaeal organisms  
664 (*P. furiosus*, *M. mazei*, *S. acidocaldarius*) investigated so far terminate transcription at multiple



665 consecutive poly(U) stretches. Possibly, *Haloferax* relies on additional termination signals or yet  
666 unknown termination factors. A putative candidate is archaeal CPSF1 (aCPSF1), a recently  
667 described archaeal termination factor<sup>96</sup> that is widespread in archaea. aCPSF1 acts as ribonuclease  
668 that cleaves transcripts after a poly(U) stretch to trim transcripts and facilitates transcription  
669 termination in *Methanococcus maripaludis*. The arising 3' UTR isoforms were detected using Term-  
670 seq analysis<sup>96</sup>. We also observed heterogeneity in the case of the Pilin and Alba transcripts,  
671 respectively, that are distinguished by varying lengths of the 3' UTR suggesting that aCPSF1 might  
672 trim a subset of genes in *H. volcanii* and *P. furiosus*. It is noteworthy that 3' UTR isoforms were also  
673 detected in Term-seq studies with *Sulfolobus* and *Methanosarcina*<sup>46</sup>. However, in contrast to the  
674 Pilin and Alba transcripts, the 3' UTR isoforms arise from termination at different sites of a single  
675 continuous poly(U) stretch suggesting that the isoforms arise from a stochastic termination process  
676 of the RNA polymerases at an extended poly(U) stretch at the end of the gene. Taken together,  
677 these data demonstrate that a variety of termination mechanisms (that can even co-occur in the  
678 same cell) can be found in archaea ranging from stochastic intrinsic termination at extended  
679 poly(U) stretches (*Pyrococcus*, *Sulfolobus*, *Methanosarcina*), to abrupt termination at short uridine  
680 tracts (*H. volcanii*) and factor-dependent termination that results in trimming of the 3'UTR (*H.*  
681 *volcanii*, *P. furiosus*, *M. maripaludis*).

682 In the context of transcription, the long and overlapping native RNA reads helped us to analyse the  
683 transcriptional landscape at multigene operons. More specifically, we focused on the archaellum  
684 operon as the transcription unit assignment remained ambiguous so far<sup>62</sup>. In contrast to  
685 bioinformatical and Illumina RNA-seq-based predictions and attempts to unravel the TU via  
686 primer extension experiments, we found that the archaellum operon in *P. furiosus* is transcribed  
687 in multiple units with highly diverse abundances. The *flaB0* gene encodes the major flagellin  
688 protein that forms the filament of the archaellum and therefore, the organism has to produce this  
689 protein in large quantities as apparent from the expression level<sup>62</sup>. Interestingly, FlaD is expressed  
690 at comparably high levels as well as supporting the idea that FlaD is a major constituent of the  
691 archaellum in *P. furiosus*. It has been speculated that FlaD forms the cytosolic ring of the archaellum  
692 that anchors the filament in the outer membrane<sup>97</sup>. The identity and functional role of FlaD are,  
693 however, not known so far.

694

695 **Insights into rRNA processing in archaea**

696 In this study, we have assessed the suitability of native RNA sequencing to obtain information on  
697 the rRNA maturation pathway of different prokaryotes. Ribosomal RNA maturation proceeds via  
698 the coordinated and defined order of ribonucleases action (exonucleolytic and/or endonucleolytic  
699 cleavages) which generate pre-rRNA intermediates with defined premature rRNA  
700 sequences<sup>66,74,98,99</sup>. The establishment of faithful rRNA maturation maps in model organisms, like  
701 *E. coli*, *S. cerevisiae* or human cell culture has required numerous analyses over the past decades  
702 <sup>66,74,98,99</sup>, and remains a technical challenge. Therefore, methodologies that might accelerate the  
703 systematic analysis of rRNA maturation pathways across the tree of life, thereby enabling to  
704 unravel the diversity of rRNA maturation strategies need to be established. Beyond the  
705 identification of processing sites, the order of the processing events which can be, in part, deduced  
706 from co-occurrence analysis of the 5' and 3' extremities is of biological relevance <sup>66,74,98,99</sup>. Whereas  
707 we could confirm and extend our general view on the rRNA maturation pathway in archaea, the  
708 3'-5' processivity of Nanopore native RNA sequencing observed for rRNA impedes the accurate  
709 analysis of pre-rRNA extremities co-segregation (see Fig. 5 and Supplementary Fig. 9b).  
710 Nevertheless, we could confirm the presence of processing sites and pre-rRNA intermediates in  
711 the different organisms analysed, with the exception of the archaea specific circular-pre-rRNA  
712 intermediates<sup>73,76,78,79</sup>, which escape analysis due to the lack of 5'/3' extremities. Among the  
713 identified pre-rRNA intermediates, precursor (4) observed in *P. furiosus*, which include ligation at  
714 the bhb motif of the upstream region of the 16S leader and downstream region of the 16S trailer  
715 sequences continuous to the downstream tRNA/23S sequences is of particular interest. The  
716 presence of this intermediate suggests that the 16S rRNA bulge-helix-bulge processing occurs  
717 prior to internal tRNA and 23S rRNA maturation. This observation is also in agreement with our  
718 recent *cis*-acting element analysis performed in *H. volcanii* <sup>73,76,79</sup>. In fact, based on this analysis we  
719 have proposed a model by which 16S rRNA maturation proceeds and is required for the  
720 downstream maturation of the internal tRNA and 23S rRNA. Moreover, we have hypothesized that  
721 ligation of the 16S rRNA leader/trailer resulting from the 16S rRNA bulge-helix-bulge maturation  
722 process generates a putative new pre-rRNA intermediate which we could observe for the first time  
723 in *Pyrococcus* using native RNA sequencing. In addition, the presence of intermediates (1) and (3)

724 support the idea that the maturation of the co-transcribed internal tRNA is inefficient or inhibited  
725 and may preferentially occur after processing of the 16S and 23S rRNA bulge-helix-bulge  
726 [suggested in<sup>76,78</sup>].

727 The biological relevance of the additionally identified intermediates for rRNA maturation is yet  
728 unclear and will need to be appraised in the light of additional functional analysis. In conclusion,  
729 despite some intrinsic limitations, direct RNA sequencing can be a useful tool to approach  
730 intricate maturation pathway like rRNA maturation, and expand our understanding of RNA  
731 maturation in prokaryotes.

732

### 733 **Towards the mapping of rRNA modification patterns**

734 RNA modifications have been described already in the 50-60s, and has gained significant attention  
735 over the last years, under the generic term of epitranscriptome<sup>100-102</sup>. The high-throughput  
736 analysis of these post-transcriptional modifications remains challenging and mostly relies on  
737 indirect methods, like primer extension stops analysis or chemical recoding/derivation  
738 strategies<sup>103,104</sup>. Native RNA sequencing may fill an important gap to systematically analyse RNA  
739 modifications on a genome-wide scale. However, global strategies enabling the faithful  
740 determination of RNA modification identity and position needs to be developed. Several recent  
741 focused analyses have explored different strategies to evaluate the capacity of ONT to accurately  
742 detect RNA modifications (e.g. m6A)<sup>14,15,55,105,106</sup>. In this study, we focused on the 16S rRNA which  
743 is known to carry different types of RNA modifications which are introduced at different positions  
744 and different stages of the small ribosomal subunit maturation<sup>73,107</sup>. Our study provides evidence  
745 that RNA modification detection benefits of the use of unmodified/hypo-modified references (in  
746 agreement with recent studies<sup>15,106</sup>). In this study, we have used a sample-compare approach  
747 analysing pre-rRNAs, which are expected to contain incomplete modification patterns, in  
748 comparison to mature rRNAs, which are expected to harbor a completed modification pattern. To  
749 validate our approach we have first focus on the almost universally conserved KsgA-dependent  
750 dimethylations of the 16S rRNA<sup>15,82,85</sup>. Using our sample-compare strategy and KsgA deletion  
751 strain we could unambiguously provide *in vivo* evidence that the archaeal KsgA-dependent  
752 methylations of the 16S rRNA are completed at a late stage of the small ribosomal subunit  
753 biogenesis. This result is in agreement with previous studies done in yeast and bacteria<sup>84-86</sup>.

754 Moreover, our sample-compare approach also suggests an increased amount of rRNA  
755 modifications in the hyperthermophile *P. furiosus*, and a decrease amount of predicted rRNA  
756 modifications in halophile *H. volcanii* in comparison to *E. coli*. These differential modification  
757 patterns across archaea are in good agreement with previous studies and may reflect adaptation  
758 to the environmental conditions that these extremophilic archaea encounter<sup>49,87,88</sup>. Unfortunately,  
759 the exact nature of these modifications can not be unveiled yet. To facilitate their high-throughput  
760 identification, future studies will require to develop and train algorithms improving the  
761 identification confidence of diverse RNA modifications.

762

### 763 **Benefits and limitations of Nanopore-based native RNA sequencing**

764 Taken together, a key advantage of the native RNA-seq approach is that multiple features can be  
765 addressed at once distinguishing the technique from the Illumina sequencing technology or  
766 biochemical assays. ONT sequencing does not require large scale equipment and is a fast method.  
767 Moreover, the method does not necessitate a reverse transcription step or PCR amplification  
768 thereby avoiding biases introduced by these enzymes. Due to the limitations of the sequencing  
769 read analysis platform, ONT sequencing does not accurately detect small RNAs yet. Additional  
770 limitations of the native RNA-seq technique are currently (i) the high amount of input RNA  
771 required (2-5 µg) to reach good coverage of the transcriptome without rRNA depletion, (ii) the 3'  
772 bias during RNA sequencing (iii) limited throughput and (iv) limited possibilities for multiplexing.  
773 Although ONT sequencing has a comparably low sequencing accuracy, this did not pose a limitation  
774 for our analysis. Due to the extraordinary read length and the sensitivity to base modifications,  
775 ONT-based native RNA-seq can provide valuable insights into (r)RNA processing, (r)RNA  
776 modifications patterns and the transcription of large operons. Strikingly, ONT-based sequencing  
777 is a *bona fide* single-molecule method and hence molecular heterogeneity in the transcriptome can  
778 be analysed so that even minor RNA populations can be detected that are inevitably lost in  
779 ensemble sequencing approaches.

780

781

782 **Data availability**

783 Sequencing data sets (gzipped raw FAST5 files) will be deposited in the Sequence Read Archive  
784 (SRA).

785

786 **Code availability**

787 A detailed documentation and code of all essential analysis steps (used tools and custom Rscripts)  
788 are available from [https://github.com/felixgrunberger/Native\\_RNAseq\\_Microbes](https://github.com/felixgrunberger/Native_RNAseq_Microbes).

789

790 **Author contributions**

791 F.G. established the nanopore workflow and performed all the bioinformatic analysis. F.G., R.K.,  
792 M.J., R.R. and A.B. performed RNA extractions. M.F. helped to optimize the RNA treatment protocol.  
793 F.G. carried out library preparations and performed sequencing. F.G., R.K., M.J. carried out *H.*  
794 *volcanii* wildtype/ $\Delta ksgA$  library preparations and sequencing. R.K. and S.F.-C. generated the KsgA  
795 deletion strain. R.K. performed primer extension analysis. F.G., S.F.-C. and D.G. designed the study,  
796 analysed and interpreted the data, and wrote the manuscript with the input of all authors. J.S., W.H.,  
797 S.F.-C. and D.G. supervised the experiments. S.F.-C. and D.G. initiated and supervised the project.

798

799 **Acknowledgements**

800 We gratefully acknowledge financial support by the Deutsche Forschungsgemeinschaft within the  
801 collaborative research center framework (CRC/SFB960) "RNP biogenesis: assembly of ribosomes  
802 and non-ribosomal RNPs and control of their function" [SFB960-TP7 to D.G.] [SFB960-TP-B13 to  
803 S.F.-C.]. The work was also supported by the DFG through grant So264/21 to J.S.

804

805

806 **Figure and figure legends**

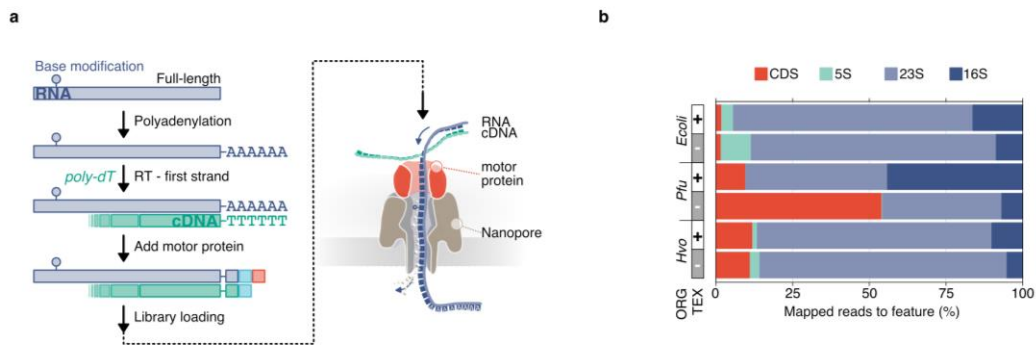

807

808 **Figure 1 | Nanopore-based native RNA sequencing of prokaryotes. a.** Key steps of library preparation: (1) native RNA  
809 is polyadenylated, which allows library preparation using the direct RNA kit from Oxford Nanopore and sequencing  
810 on a MinION device. (2) 3' ligation is performed to add the an adapter carrying the motor-protein (red square),  
811 which unzips the RNA-cDNA hybrid and pulls the RNA through the Nanopore (detailed description see  
812 Supplementary Fig. 1a). **b.** Data sets for three prokaryotic model organisms (Ecoli: *Escherichia coli*, Pfu: *Pyrococcus*  
813 *furiosus*, Hvo: *Haloflex volcanii*) with (+) and without (-) Terminator 5'-Phosphate-Dependent Exonuclease (TEX)  
814 treatment were collected and mapped to their respective reference genome. Transcript abundances of genomic  
815 features (protein coding genes (CDS): red, 5S rRNA: green, 16S rRNA: purple, 23S rRNA: light-purple) were estimated  
816 using featurecounts<sup>42</sup>.

817

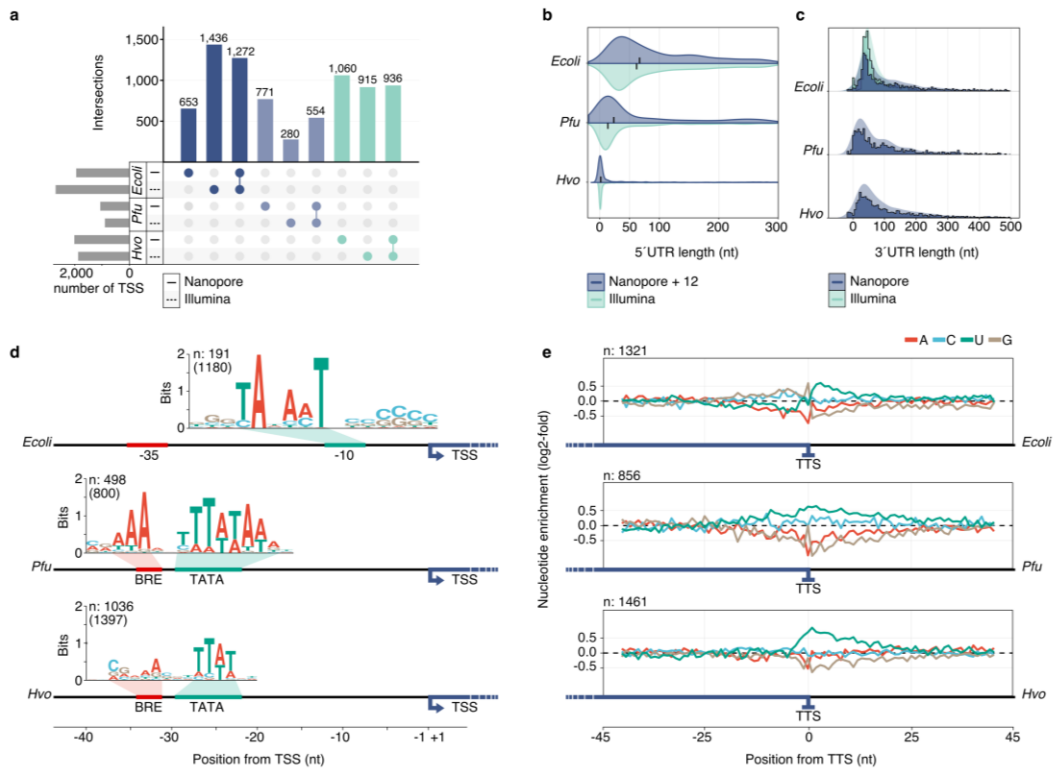

818

819 **Figure 2: Detection of transcript boundaries.** **a**, Primary transcription start sites (TSS) were predicted based on  
 820 Nanopore reads and compared to Illumina d(ifferential) RNA-Seq data from published data sets for *E. coli*<sup>30</sup>, *P.*  
 821 *furiosus*<sup>31</sup> and *H. volcanii*<sup>27</sup>. The total number of all genes with a detected TSS is shown as grey barplots and results  
 822 from the sum of Nanopore-only predicted TSS and the intersection to the Illumina data. **b**, Position of TSS is  
 823 corrected for 12 nucleotides to calculate the length of 5' untranslated regions (UTR) in the Nanopore data sets  
 824 (purple). 5' UTRs are compared to d(ifferential) RNA-Seq Illumina data sets (light-green). Median values are indicated  
 825 by a black bar inside the distribution (compare Supplementary Fig. 6). **c**, Length of 3' UTRs is based on the prediction  
 826 of transcription termination sites (TTS) and the comparison to annotated gene ends. Distribution of lengths is shown  
 827 for Nanopore data sets (purple) and compared to a Term-Seq *E. coli* Illumina data set (light-green)<sup>108</sup>. **d**, MEME  
 828 analysis<sup>45</sup> of extracted sequences upstream of Nanopore-predicted TSS reveals bacterial (position -10) and archaeal-  
 829 specific promoter elements (BRE: B-recognition element, recognized by transcription factor B, TATA: TATA-box  
 830 bound by the TATA-binding protein TBP), therefore validating the positions of predicted TSS. **e**, Nucleotide  
 831 enrichment meta analysis was carried out by comparing the genomic sequences surrounding the TTS (-45 to +45)  
 832 to randomly selected intergenic positions of the respective organism (n: 10000) (Terminator motifs in  
 833 Supplementary Fig. 7).

834

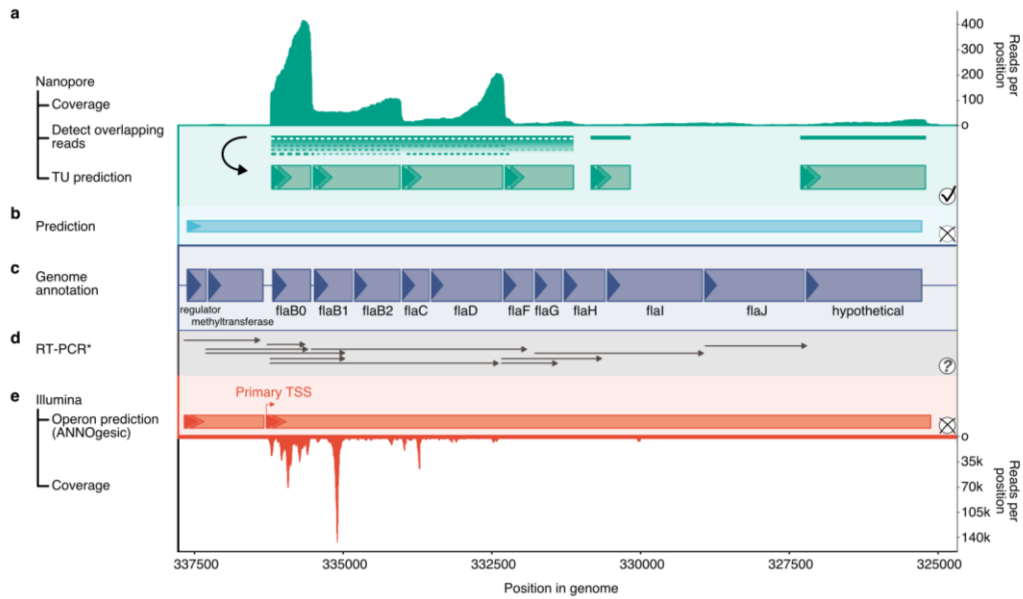

835

836 **Figure 3 | Transcription unit (TU) annotation of the archaeellum-operon in *P. furiosus*.** **a**, Coverage of Nanopore reads  
837 is shown in the top panel. TU prediction is performed by detection and linkage of overlapping reads and splitting  
838 them according to a 3' drop in coverage (see Supplementary Fig. 8). Predicted TUs are drawn with green boxes  
839 according to scale. **b**, Comparison to bioinformatical prediction using the DOOR2 database<sup>50</sup>. **c**, Genome annotation  
840 with abbreviated gene names, boxed drawn to scale and strand indicated by triangles<sup>31</sup>. **d**, Comparison to results  
841 from published RT-PCR experiments<sup>62</sup>. All transcripts detected are drawn by arrows. **e**, Operon prediction based on  
842 mixed Illumina-Seq (coverage in lower panel) and predicted by ANNOgesic<sup>31,109</sup>. The primary transcription start site  
843 (TSS) of the large transcriptional unit is highlighted.

844



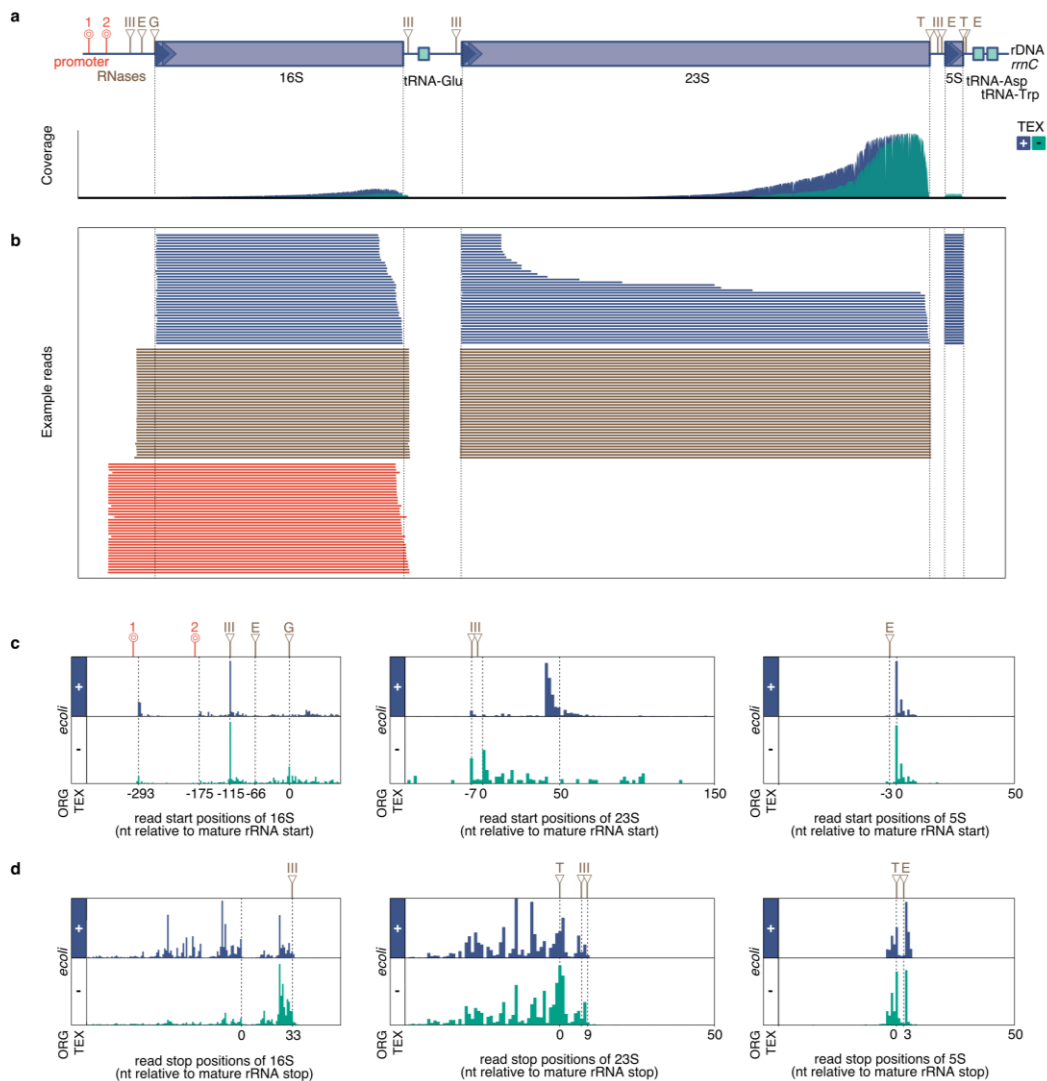

845

846 **Figure 4 | Detection and confirmation of rRNA processing sites in *E. coli*.** **a**, Transcription of the rDNA locus (*rrnC*) is  
 847 starting from two promoters (transcription start sites at -293 and -175)<sup>49</sup>. Precursor RNAs are cleaved by RNases  
 848 (brown) at depicted positions <sup>64,65,73,80</sup>. Nanopore coverage is shown for TEX (+, blue) and NOTEX (-, blue) samples.  
 849 **b**, Single-read analysis of precursor and mature rRNAs. Reads were filtered according to read start and stop positions  
 850 and are color-coded by mature rRNAs (blue), RNaseIII-processed precursors (brown) and precursor rRNAs starting  
 851 from the TSS (red). For each category the 40 longest reads were selected and are shown here as single lines. **c**,  
 852 Histograms of read start positions and **d**, read end positions of 16S, 23S and 5S rRNA relative to annotated  
 853 boundaries of mature rRNAs of TEX (+) and NOTEX (-) samples. Cleavage sites, transcription start sites and  
 854 transcription boundaries are indicated by dashed lines.

855

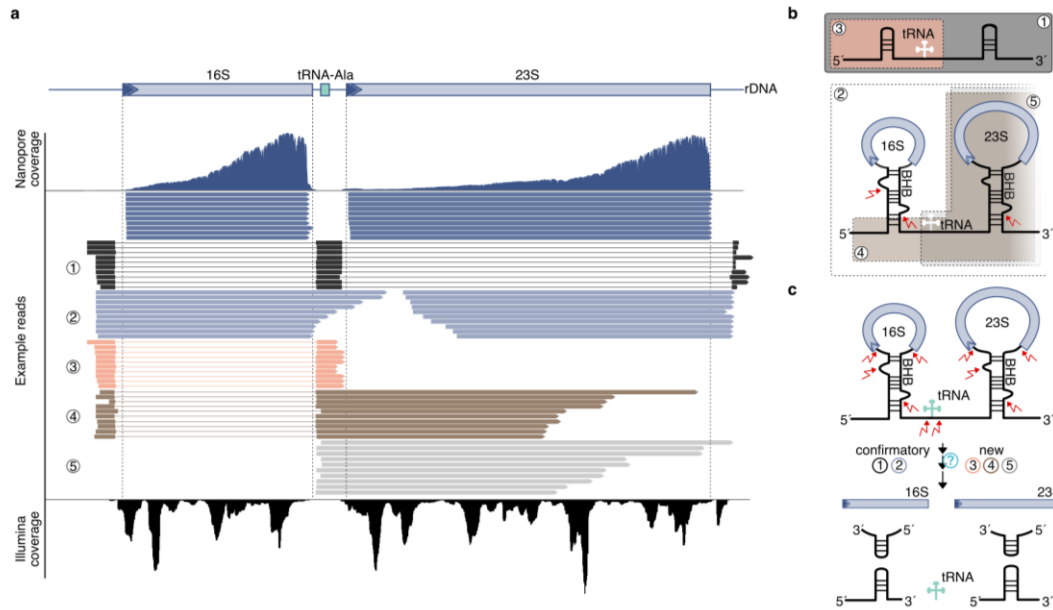

856

857 **Figure 5 | Ribosomal RNA processing variation in *P. furiosus*.** **a**, Nanopore coverage of the rDNA locus in *P. furiosus*  
 858 containing the tRNA-Ala. Single reads were filtered according to their 5' and 3' lengths (cutting from 16S and 23S  
 859 rRNA annotation) and are shown in the example read track from a snapshot taken with the integrated genome  
 860 browser (IGV)<sup>110</sup>. Besides mature 16S rRNA and 23S rRNA, the remaining reads were classified as (1) a processing  
 861 variant that entails leading sequence-tRNA-trailing sequence, (2) probably fragmented full-length precursor rRNAs,  
 862 (3) leading sequence-tRNA, (4) leading sequence-tRNA-23S rRNA and (5) tRNA-23S rRNA (quantification shown in  
 863 Supplementary Fig. 13c). Illumina coverage from mixed RNA-Seq is shown in the bottom panel<sup>31</sup>. **b**, Read classes are  
 864 shown as processing sketches and color-coded as on the left. **c**, Maturation steps of the rRNA processing pathway  
 865 as proposed for *Archaeoglobus fulgidus*<sup>49</sup> with cleavage sites indicated by red arrows (full proposed pathway in  
 866 Supplementary Fig. 13a). Processing variants found in *P. furiosus* (4, 5) potentially represent intermediate steps that  
 867 refine the current rRNA maturation model in archaea (Supplementary Fig. 13b).

868

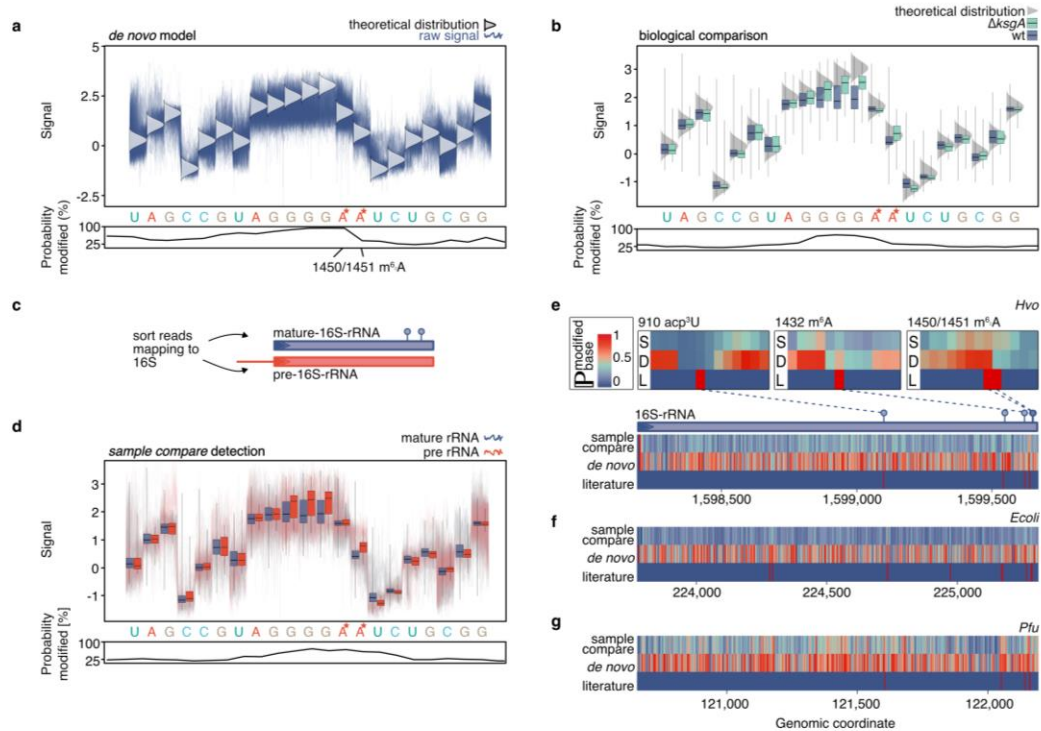

869

870

871

872 **Figure 6 | Detection of modified bases in 16S rRNA based on raw signal comparisons. a**, Raw signal of reads (blue

873 RNA (grey distribution) mapping to 16S rRNA in *H. volcanii* are compared to the theoretical distribution of native non-modified

874 RNA (grey distribution) using the de novo detection model in tomo in the upper track<sup>47</sup>. The m<sup>6</sup>A modification at position 1450/1451 (from 16S start)

875 is indicated by an asterisks in the sequence track. The probability of each base to be modified (in %) is calculated and shown in the lower panel for the selected sequence. **b**, Position-specific

876 boxplot comparison of signals from sequences surrounding the m<sup>6</sup>A modification in *H. volcanii* wildtype (blue) and the  $\Delta$ KsgA mutant. The theoretical distribution of read signal is indicated by a grey distribution curve for every base.

877 The probability is computed based on the comparison of the two samples. **c**, Strategy for generating a comparison data set: Reads mapping to the 16S rRNA are categorized according to their read start position from the mature

878 annotated rRNA as mature or pre-16S-rRNAs. **d**, Sample comparison model as shown in panel b based on mature (blue) and pre-rRNAs (red). **e**, Heatmap for the probability of a base to be modified (blue, light-green, red) shown

879 for the mature 16S rRNA. Probabilities were calculated bases on a de novo (D) model, a sample comparison model (S) using the strategy described in panel c and plotted for already known modification sites (L)<sup>49</sup>. Three of those

880 modifications in *H. volcanii* are shown enlarged in the upper panel. Data are summarized for *H. volcanii* , *E. coli* <sup>48</sup>

881 and **g**, *P. furiosus*.

882

883

884

885

886

887

888

889

890

891

892

## 893 References

- 894 1. Levy, S. E. & Myers, R. M. Advancements in Next-Generation Sequencing. *Annual review of genomics*  
895 *and human genetics* **17**, 95–115; 10.1146/annurev-genom-083115-022413 (2016).
- 896 2. Escobar-Zepeda, A., Vera-Ponce de León, A. & Sanchez-Flores, A. The Road to Metagenomics: From  
897 Microbiology to DNA Sequencing Technologies and Bioinformatics. *Frontiers in Genetics* **6**, 348;  
898 10.3389/fgene.2015.00348 (2015).
- 899 3. Wang, Z., Gerstein, M. & Snyder, M. RNA-Seq: a revolutionary tool for transcriptomics. *Nature*  
900 *reviews. Genetics* **10**, 57–63; 10.1038/nrg2484 (2009).
- 901 4. Hör, J., Gorski, S. A. & Vogel, J. Bacterial RNA Biology on a Genome Scale. *Molecular cell* **70**, 785–  
902 799; 10.1016/j.molcel.2017.12.023 (2018).
- 903 5. Croucher, N. J. & Thomson, N. R. Studying bacterial transcriptomes using RNA-seq. *Current opinion*  
904 *in microbiology* **13**, 619–624; 10.1016/j.mib.2010.09.009 (2010).
- 905 6. Nowrousian, M. Next-generation sequencing techniques for eukaryotic microorganisms:  
906 sequencing-based solutions to biological problems. *Eukaryotic cell* **9**, 1300–1310;  
907 10.1128/EC.00123-10 (2010).
- 908 7. Saliba, A.-E., C Santos, S. & Vogel, J. New RNA-seq approaches for the study of bacterial pathogens.  
909 *Current opinion in microbiology* **35**, 78–87; 10.1016/j.mib.2017.01.001 (2017).
- 910 8. Stark, R., Grzelak, M. & Hadfield, J. RNA sequencing: the teenage years. *Nature Reviews Genetics*;  
911 10.1038/s41576-019-0150-2 (2019).
- 912 9. Tilgner, H. *et al.* Comprehensive transcriptome analysis using synthetic long-read sequencing reveals  
913 molecular co-association of distant splicing events. *Nature Biotechnology* **33**, 736–742;  
914 10.1038/nbt.3242 (2015).
- 915 10. Byrne, A., Cole, C., Volden, R. & Vollmers, C. Realizing the potential of full-length transcriptome  
916 sequencing. *Philosophical transactions of the Royal Society of London. Series B, Biological sciences*  
917 **374**, 20190097; 10.1098/rstb.2019.0097 (2019).
- 918 11. Eid, J. *et al.* Real-time DNA sequencing from single polymerase molecules. *Science (New York, N.Y.)*  
919 **323**, 133–138; 10.1126/science.1162986 (2009).
- 920 12. Mikheyev, A. S. & Tin, M. M. Y. A first look at the Oxford Nanopore MinION sequencer. *Molecular*  
921 *ecology resources* **14**, 1097–1102; 10.1111/1755-0998.12324 (2014).
- 922 13. Soneson, C. *et al.* A comprehensive examination of Nanopore native RNA sequencing for  
923 characterization of complex transcriptomes. *Nature Communications* **10**, 1–14; 10.1038/s41467-  
924 019-11272-z (2019).
- 925 14. Liu, H. *et al.* Accurate detection of m6A RNA modifications in native RNA sequences. *Nature*  
926 *Communications*, 1–9; 10.1101/525741 (2019).
- 927 15. Smith, A. M., Jain, M., Mulroney, L., Garalde, D. R. & Akeson, M. Reading canonical and modified  
928 nucleobases in 16S ribosomal RNA using nanopore native RNA sequencing. *PLOS ONE* **14**, 1–15;  
929 10.1371/journal.pone.0216709 (2019).
- 930 16. Workman, R. E. *et al.* Nanopore native RNA sequencing of a human poly(A) transcriptome. *Nature*  
931 *Methods* **16**, 1297–1305; 10.1038/s41592-019-0617-2 (2019).
- 932 17. Viehweger A, Krautwurst S, Lamkiewicz K, Madhugiri R, Ziebuhr J, Hölzer M, Marz M. Nanopore  
933 direct RNA sequencing reveals modification in full-length coronavirus genomes. *bioRxiv Genomics*,  
934 1–15; 10.1101/483693 (2018).
- 935 18. Keller, M. W. *et al.* Direct RNA Sequencing of the Coding Complete Influenza A Virus Genome.  
936 *Scientific Reports* **8**, 1–8; 10.1038/s41598-018-32615-8 (2018).
- 937 19. Boldogkői, Z., Moldován, N., Balázs, Z., Snyder, M. & Tombácz, D. Long-Read Sequencing – A  
938 Powerful Tool in Viral Transcriptome Research. *Trends in Microbiology* **27**, 578–592;  
939 10.1016/j.tim.2019.01.010 (2019).
- 940 20. Viehweger, A. *et al.* Direct RNA nanopore sequencing of full-length coron-avirus genomes provides  
941 novel insights into structural variants and enables modification analysis. *bioRxiv*, 483693;  
942 10.1101/483693 (2019).
- 943 21. Tombácz, D. *et al.* Multiple Long-Read Sequencing Survey of Herpes Simplex Virus Dynamic  
944 Transcriptome. *Frontiers in Genetics* **10**, 834; 10.3389/fgene.2019.00834 (2019).

- 945 22. Zhao, L. *et al.* Analysis of Transcriptome and Epitranscriptome in Plants Using PacBio Iso-Seq and  
946 Nanopore-Based Direct RNA Sequencing. *Frontiers in Genetics* **10**, 253; 10.3389/fgene.2019.00253  
947 (2019).
- 948 23. Bayega, A. *et al.* Transcriptome landscape of the developing olive fruit fly embryo delineated by  
949 Oxford Nanopore long-read RNA-Seq (2018).
- 950 24. Byrne, A. *et al.* Nanopore long-read RNAseq reveals widespread transcriptional variation among the  
951 surface receptors of individual B cells. *Nature Communications* **8**; 10.1038/ncomms16027 (2017).
- 952 25. Rahimi, K., Venø, M. T., Dupont, D. M. & Kjems, J. Nanopore sequencing of full-length circRNAs in  
953 human and mouse brains reveals circRNA-specific exon usage and intron retention (2019).
- 954 26. Dar, D. & Sorek, R. High-resolution RNA 3-ends mapping of bacterial Rho-dependent transcripts.  
955 *Nucleic Acids Research* **46**, 6797–6805; 10.1093/nar/gky274 (2018).
- 956 27. Babski, J. *et al.* Genome-wide identification of transcriptional start sites in the haloarchaeon  
957 Haloferax volcanii based on differential RNA-Seq (dRNA-Seq). *BMC Genomics* **17**, 1–19;  
958 10.1186/s12864-016-2920-y (2016).
- 959 28. Laass, S. *et al.* Characterization of the transcriptome of Haloferax volcanii , grown under four  
960 different conditions , with mixed RNA-Seq. *PLOS ONE* **14**, 1–24; 10.1371/journal.pone.0215986  
961 (2019).
- 962 29. Mao, X. *et al.* Revisiting operons: An analysis of the landscape of transcriptional units in E. coli. *BMC*  
963 *Bioinformatics*; 10.1186/s12859-015-0805-8 (2015).
- 964 30. Thomason, M. K. *et al.* Global transcriptional start site mapping using differential RNA sequencing  
965 reveals novel antisense RNAs in Escherichia coli. *Journal of Bacteriology* **197**, 18–28;  
966 10.1128/JB.02096-14 (2015).
- 967 31. Grünberger, F. *et al.* Next Generation DNA-Seq and Differential RNA-Seq Allow Re-annotation of the  
968 Pyrococcus furiosus DSM 3638 Genome and Provide Insights Into Archaeal Antisense Transcription.  
969 *Frontiers in Microbiology*; 10.3389/fmicb.2019.01603 (2019).
- 970 32. Stetter, K. O., König, H. & Stackebrandt, E. Pyrodictium gen. nov., a New Genus of Submarine Disc-  
971 Shaped Sulphur Reducing Archaeobacteria Growing Optimally at 105°C. *Systematic and Applied*  
972 *Microbiology*; 10.1016/S0723-2020(83)80011-3 (1983).
- 973 33. Allers, T. & Mevarech, M. Archaeal genetics - the third way. *Nature Reviews Genetics* **6**, 58–73;  
974 10.1038/nrg1504 (2005).
- 975 34. Knüppel, R. *et al.* Insights into the evolutionary conserved regulation of Rio ATPase activity. *Nucleic*  
976 *Acids Research* **46**, 1441–1456; 10.1093/nar/gkx1236 (2018).
- 977 35. Chomczynski, P. & Sacchi, N. Single-step method of RNA isolation by acid guanidinium thiocyanate-  
978 phenol-chloroform extraction. *Analytical biochemistry* **162**, 156–159; 10.1006/abio.1987.9999  
979 (1987).
- 980 36. Yan, B., Boitano, M., Clark, T. A. & Ettwiller, L. SMRT-Cappable-seq reveals complex operon variants  
981 in bacteria. *Nature Communications*; 10.1038/s41467-018-05997-6 (2018).
- 982 37. Weirather, J. L. *et al.* Comprehensive comparison of Pacific Biosciences and Oxford Nanopore  
983 Technologies and their applications to transcriptome analysis. *F1000Research* **6**, 100;  
984 10.12688/f1000research.10571.2 (2017).
- 985 38. Riley, M. *et al.* Escherichia coli K-12: a cooperatively developed annotation snapshot--2005. *Nucleic*  
986 *Acids Research* **34**, 1–9; 10.1093/nar/gkj405 (2006).
- 987 39. Hartman, A. L. *et al.* The complete genome sequence of Haloferax volcanii DS2, a model archaeon.  
988 *PLOS ONE* **5**, e9605; 10.1371/journal.pone.0009605 (2010).
- 989 40. Li, H. Minimap2: Pairwise alignment for nucleotide sequences. *Bioinformatics*;  
990 10.1093/bioinformatics/bty191 (2018).
- 991 41. Li, H. *et al.* The Sequence Alignment/Map format and SAMtools. *Bioinformatics* **25**, 2078–2079;  
992 10.1093/bioinformatics/btp352 (2009).
- 993 42. Liao, Y., Smyth, G. K. & Shi, W. The R package Rsubread is easier, faster, cheaper and better for  
994 alignment and quantification of RNA sequencing reads. *Nucleic Acids Research*; 10.1093/nar/gkz114  
995 (2019).
- 996 43. Love, M. I., Huber, W. & Anders, S. Moderated estimation of fold change and dispersion for RNA-seq  
997 data with DESeq2. *Genome Biology* **15**, 550; 10.1186/s13059-014-0550-8 (2014).
- 998 44. Loman, N. J., Quick, J. & Simpson, J. T. A complete bacterial genome assembled de novo using only  
999 nanopore sequencing data. *Nature Methods* **12**, 733–735; 10.1038/nmeth.3444 (2015).
- 1000 45. Bailey, T. L. *et al.* MEME SUITE: tools for motif discovery and searching. *Nucleic Acids Research* **37**,  
1001 W202-8; 10.1093/nar/gkp335 (2009).



- 1002 46. Dar, D., Prasse, D., Schmitz, R. A. & Sorek, R. Widespread formation of alternative 3' UTR isoforms  
1003 via transcription termination in archaea. *Nature Microbiology* **1**, 16143;  
1004 10.1038/nmicrobiol.2016.143 (2016).
- 1005 47. Stoiber, M. *et al.* *De novo Identification of DNA Modifications Enabled by Genome-Guided Nanopore*  
1006 *Signal Processing* (2016).
- 1007 48. Boccaletto, P. *et al.* MODOMICS: a database of RNA modification pathways. 2017 update. *Nucleic*  
1008 *Acids Research* **46**, D303-D307; 10.1093/nar/gkx1030 (2018).
- 1009 49. Grosjean, H., Gaspin, C., Marck, C., Decatur, W. A. & Crécy-Lagard, V. de. RNomics and Modomics in  
1010 the halophilic archaea *Haloferax volcanii*: Identification of RNA modification genes. *BMC Genomics*  
1011 **9**, 1–26; 10.1186/1471-2164-9-470 (2008).
- 1012 50. Mao, X. *et al.* DOOR 2.0: Presenting operons and their functions through dynamic and integrated  
1013 views. *Nucleic Acids Research* **42**; 10.1093/nar/gkt1048 (2014).
- 1014 51. Bolger, A. M., Lohse, M. & Usadel, B. Trimmomatic: a flexible trimmer for Illumina sequence data.  
1015 *Bioinformatics* **30**, 2114–2120; 10.1093/bioinformatics/btu170 (2014).
- 1016 52. Langmead, B. & Salzberg, S. L. Fast gapped-read alignment with Bowtie 2. *Nature Methods* **9**, 357–  
1017 359; 10.1038/nmeth.1923 (2012).
- 1018 53. Bohlin, J., Eldholm, V., Pettersson, J. H. O., Brynildsrud, O. & Snipen, L. The nucleotide composition  
1019 of microbial genomes indicates differential patterns of selection on core and accessory genomes.  
1020 *BMC Genomics* **18**, 151; 10.1186/s12864-017-3543-7 (2017).
- 1021 54. Wick, R. R., Judd, L. M. & Holt, K. E. Performance of neural network basecalling tools for Oxford  
1022 Nanopore sequencing. *Genome Biology* **20**, 1–10; 10.1186/s13059-019-1727-y (2019).
- 1023 55. Garalde, D. R. *et al.* Highly parallel direct RNA sequencing on an array of nanopores. *Nature Methods*  
1024 **15**, 201–206; 10.1038/nmeth.4577 (2018).
- 1025 56. Workman, R. E. *et al.* Nanopore native RNA sequencing of a human poly(A) transcriptome. *bioRxiv*;  
1026 10.1101/459529 (2018).
- 1027 57. Parker, M. T. *et al.* Nanopore direct RNA sequencing maps an Arabidopsis N6 methyladenosine  
1028 epitranscriptome. *bioRxiv*; 10.1101/706002 (2019).
- 1029 58. Ju, X., Li, D. & Liu, S. Full-length RNA profiling reveals pervasive bidirectional transcription  
1030 terminators in bacteria. *Nature Microbiology*; 10.1038/s41564-019-0500-z (2019).
- 1031 59. Santangelo, T. J., Cubonová, L'u., Skinner, K. M. & Reeve, J. N. Archaeal intrinsic transcription  
1032 termination in vivo. *Journal of Bacteriology* **191**, 7102–7108; 10.1128/JB.00982-09 (2009).
- 1033 60. Smith, A. M. *et al.* Reading canonical and modified nucleotides in 16S ribosomal RNA using nanopore  
1034 direct RNA sequencing. *bioRxiv*; 10.1101/132274 (2017).
- 1035 61. Wongsurawat, T. *et al.* Rapid sequencing of multiple RNA viruses in their native form. *Frontiers in*  
1036 *Microbiology* **10**, 1–8; 10.3389/fmicb.2019.00260 (2019).
- 1037 62. Näther-Schindler, D. J., Schopf, S., Bellack, A., Rachel, R. & Wirth, R. *Pyrococcus furiosus* flagella:  
1038 biochemical and transcriptional analyses identify the newly detected flab0 gene to encode the major  
1039 flagellin. *Frontiers in Microbiology* **5**, 695; 10.3389/fmicb.2014.00695 (2014).
- 1040 63. Lioliou, E. *et al.* Global regulatory functions of the *Staphylococcus aureus* endoribonuclease III in  
1041 gene expression. *PLoS Genetics* **8**, e1002782; 10.1371/journal.pgen.1002782 (2012).
- 1042 64. Smith, B. A., Gupta, N., Denny, K. & Culver, G. M. Characterization of 16S rRNA Processing with Pre-  
1043 30S Subunit Assembly Intermediates from *E. coli*. *Journal of Molecular Biology*;  
1044 10.1016/j.jmb.2018.04.009 (2018).
- 1045 65. Shajani, Z., Sykes, M. T. & Williamson, J. R. Assembly of bacterial ribosomes. *Annual review of*  
1046 *biochemistry* **80**, 501–526; 10.1146/annurev-biochem-062608-160432 (2011).
- 1047 66. Bechhofer, D. H. & Deutscher, M. P. Bacterial ribonucleases and their roles in RNA metabolism.  
1048 *Critical reviews in biochemistry and molecular biology* **54**, 242–300;  
1049 10.1080/10409238.2019.1651816 (2019).
- 1050 67. Klappenbach, J. A., Saxman, P. R., Cole, J. R. & Schmidt, T. M. rrndb: the Ribosomal RNA Operon Copy  
1051 Number Database. *Nucleic Acids Research* **29**, 181–184; 10.1093/nar/29.1.181 (2001).
- 1052 68. Maeda, M., Shimada, T., Ishihama, A. & Semsey, S. Strength and Regulation of Seven rRNA Promoters  
1053 in *Escherichia coli*. *PLOS ONE* **10**, e0144697; 10.1371/journal.pone.0144697 (2015).
- 1054 69. Hofmann, S. & Miller, O. L. Visualization of ribosomal ribonucleic acid synthesis in a ribonuclease III-  
1055 Deficient strain of *Escherichia coli*. *Journal of Bacteriology* **132**, 718–722 (1977).
- 1056 70. Jacob, A. I., Köhrer, C., Davies, B. W., RajBhandary, U. L. & Walker, G. C. Conserved bacterial RNase  
1057 YbeY plays key roles in 70S ribosome quality control and 16S rRNA maturation. *Molecular cell* **49**,  
1058 427–438; 10.1016/j.molcel.2012.11.025 (2013).

- 1059 71. Sulthana, S. & Deutscher, M. P. Multiple exoribonucleases catalyze maturation of the 3' terminus of  
1060 16S ribosomal RNA (rRNA). *The Journal of biological chemistry* **288**, 12574–12579;  
1061 10.1074/jbc.C113.459172 (2013).
- 1062 72. Yip, W. S. V., Vincent, N. G. & Baserga, S. J. Ribonucleoproteins in archaeal pre-rRNA processing and  
1063 modification. *Archaea (Vancouver, B.C.)* **2013**, 614735; 10.1155/2013/614735 (2013).
- 1064 73. Ferreira-Cerca, S. in *RNA Metabolism and Gene Expression in Archaea*, edited by B. Clouet-d'Orval  
1065 (Springer International Publishing, Cham, 2017), pp. 129–158.
- 1066 74. Henras, A. K., Plisson-Chastang, C., O'Donohue, M.-F., Chakraborty, A. & Gleizes, P.-E. An overview  
1067 of pre-ribosomal RNA processing in eukaryotes. *Wiley interdisciplinary reviews. RNA* **6**, 225–242;  
1068 10.1002/wrna.1269 (2015).
- 1069 75. Clouet-D'Orval, B. *et al.* Insights into RNA-processing pathways and associated RNA-degrading  
1070 enzymes in Archaea. *FEMS Microbiology Reviews* **42**, 579–613; 10.1093/femsre/fuy016 (2018).
- 1071 76. Tang, T. H. *et al.* RNomics in Archaea reveals a further link between splicing of archaeal introns and  
1072 rRNA processing. *Nucleic Acids Research* **30**, 921–930; 10.1093/nar/30.4.921 (2002).
- 1073 77. Russell, A. G., Ebhardt, H. & Dennis, P. P. Substrate requirements for a novel archaeal endonuclease  
1074 that cleaves within the 5' external transcribed spacer of *Sulfolobus acidocaldarius* precursor rRNA.  
1075 *Genetics* **152**, 1373–1385 (1999).
- 1076 78. Jüttner, M. *et al.* A versatile cis-acting element reporter system to study the function, maturation  
1077 and stability of ribosomal RNA mutants in archaea. *Nucleic Acids Research*; 10.1093/nar/gkz1156  
1078 (2019).
- 1079 79. Danan, M., Schwartz, S., Edelheit, S. & Sorek, R. Transcriptome-wide discovery of circular RNAs in  
1080 Archaea. *Nucleic Acids Research* **40**, 3131–3142; 10.1093/nar/gkr1009 (2012).
- 1081 80. Ferreira-Cerca, S. *RNA Metabolism and Gene Expression in Archaea - Chapter6 - Life and Death of*  
1082 *Ribosomes in Archaea* (2017).
- 1083 81. Wongsurawat, T. *et al.* Decoding the Epitranscriptional Landscape from Native RNA Sequences.  
1084 *bioRxiv* **17**, 487819; 10.1101/487819 (2018).
- 1085 82. O'Farrell, H. C., Pulicherla, N., Desai, P. M. & Rife, J. P. Recognition of a complex substrate by the  
1086 KsgA/Dim1 family of enzymes has been conserved throughout evolution. *RNA (New York, N.Y.)* **12**,  
1087 725–733; 10.1261/rna.2310406 (2006).
- 1088 83. Rang, F. J., Kloosterman, W. P. & Ridder, J. de. From squiggle to basepair: Computational approaches  
1089 for improving nanopore sequencing read accuracy. *Genome Biology* **19**, 1–11; 10.1186/s13059-018-  
1090 1462-9 (2018).
- 1091 84. Strunk, B. S. *et al.* Ribosome assembly factors prevent premature translation initiation by 40S  
1092 assembly intermediates. *Science (New York, N.Y.)* **333**, 1449–1453; 10.1126/science.1208245  
1093 (2011).
- 1094 85. Xu, Z., O'Farrell, H. C., Rife, J. P. & Culver, G. M. A conserved rRNA methyltransferase regulates  
1095 ribosome biogenesis. *Nature structural & molecular biology* **15**, 534–536; 10.1038/nsmb.1408  
1096 (2008).
- 1097 86. Lafontaine, D. L., Preiss, T. & Tollervey, D. Yeast 18S rRNA dimethylase Dim1p: a quality control  
1098 mechanism in ribosome synthesis? *Molecular and cellular biology* **18**, 2360–2370;  
1099 10.1128/mcb.18.4.2360 (1998).
- 1100 87. Dennis, P. P., Tripp, V., Lui, L., Lowe, T. & Randau, L. C/D box sRNA-guided 2'-O-methylation patterns  
1101 of archaeal rRNA molecules. *BMC Genomics*; 10.1186/s12864-015-1839-z (2015).
- 1102 88. Gomes-Filho, J. V. & Randau, L. RNA stabilization in hyperthermophilic archaea. *Annals of the New*  
1103 *York Academy of Sciences* **1447**, 88–96; 10.1111/nyas.14060 (2019).
- 1104 89. Ebright, R. H., Werner, F. & Zhang, X. RNA Polymerase Reaches 60: Transcription Initiation,  
1105 Elongation, Termination, and Regulation in Prokaryotes. *Journal of Molecular Biology* **431**, 3945–  
1106 3946; 10.1016/j.jmb.2019.07.026 (2019).
- 1107 90. Babski, J. *et al.* Small regulatory RNAs in Archaea. *RNA Biology* **11**, 484–493; 10.4161/rna.28452  
1108 (2014).
- 1109 91. Oliva, G., Sahr, T. & Buchrieser, C. Small RNAs, 5' UTR elements and RNA-binding proteins in  
1110 intracellular bacteria: impact on metabolism and virulence. *FEMS Microbiology Reviews* **39**, 331–  
1111 349; 10.1093/femsre/fuv022 (2015).
- 1112 92. Ren, G.-X., Guo, X.-P. & Sun, Y.-C. Regulatory 3' Untranslated Regions of Bacterial mRNAs. *Frontiers*  
1113 *in Microbiology* **8**, 1276; 10.3389/fmicb.2017.01276 (2017).
- 1114 93. Hirtreiter, A. *et al.* Spt4/5 stimulates transcription elongation through the RNA polymerase clamp  
1115 coiled-coil motif. *Nucleic Acids Research* **38**, 4040–4051; 10.1093/nar/gkq135 (2010).

- 1116 94. Hirtreiter, A., Grohmann, D. & Werner, F. Molecular mechanisms of RNA polymerase--the F/E  
1117 (RPB4/7) complex is required for high processivity in vitro. *Nucleic Acids Research* **38**, 585–596;  
1118 10.1093/nar/gkp928 (2010).
- 1119 95. Berkemer, S. J. *et al. Identification of RNA 3' ends and termination sites in Haloferax volcanii* (2019).
- 1120 96. Yue, L. *et al. aCPSF1 controlled archaeal transcription termination: a prototypical eukaryotic model*  
1121 (2019).
- 1122 97. Daum, B. *et al. Structure and in situ organisation of the Pyrococcus furiosus archaeellum machinery.*  
1123 *eLife* **6**; 10.7554/eLife.27470 (2017).
- 1124 98. Deutscher, M. P. Twenty years of bacterial RNases and RNA processing: how we've matured. *RNA*  
1125 (*New York, N.Y.*) **21**, 597–600; 10.1261/rna.049692.115 (2015).
- 1126 99. Venema, J. & Tollervey, D. Processing of pre-ribosomal RNA in *Saccharomyces cerevisiae*. *Yeast*  
1127 (*Chichester, England*) **11**, 1629–1650; 10.1002/yea.320111607 (1995).
- 1128 100. LITTLEFIELD, J. W. & DUNN, D. B. Natural occurrence of thymine and three methylated adenine  
1129 bases in several ribonucleic acids. *Nature* **181**, 254–255; 10.1038/181254a0 (1958).
- 1130 101. SMITH, J. D. & DUNN, D. B. The occurrence of methylated guanines in ribonucleic acids from  
1131 several sources. *The Biochemical journal* **72**, 294–301; 10.1042/bj0720294 (1959).
- 1132 102. Li, S. & Mason, C. E. The pivotal regulatory landscape of RNA modifications. *Annual review of*  
1133 *genomics and human genetics* **15**, 127–150; 10.1146/annurev-genom-090413-025405 (2014).
- 1134 103. Schwartz, S. & Motorin, Y. Next-generation sequencing technologies for detection of modified  
1135 nucleotides in RNAs. *RNA Biology* **14**, 1124–1137; 10.1080/15476286.2016.1251543 (2017).
- 1136 104. Sas-Chen, A. & Schwartz, S. Misincorporation signatures for detecting modifications in mRNA:  
1137 Not as simple as it sounds. *Methods (San Diego, Calif.)* **156**, 53–59; 10.1016/j.ymeth.2018.10.011  
1138 (2019).
- 1139 105. Lorenz, D. A., Sathe, S., Einstein, J. M. & Yeo, G. W. Direct RNA sequencing enables m6A  
1140 detection in endogenous transcript isoforms at base specific resolution. *RNA (New York, N.Y.);*  
1141 10.1261/rna.072785.119 (2019).
- 1142 106. Leger, A. *et al. RNA modifications detection by comparative Nanopore direct RNA sequencing*  
1143 (2019).
- 1144 107. Sloan, K. E. *et al. Tuning the ribosome: The influence of rRNA modification on eukaryotic*  
1145 *ribosome biogenesis and function.* *RNA Biology* **14**, 1138–1152; 10.1080/15476286.2016.1259781  
1146 (2017).
- 1147 108. Dar, D. & Sorek, R. Extensive reshaping of bacterial operons by programmed mRNA decay. *PLoS*  
1148 *Genetics* **14**, 1–19; 10.1371/journal.pgen.1007354 (2018).
- 1149 109. Yu, S.-H., Vogel, J. & Förstner, K. U. *ANNOgesic: A Swiss army knife for the RNA-Seq based*  
1150 *annotation of bacterial/archaeal genomes* (2017).
- 1151 110. Freese, N. H., Norris, D. C. & Loraine, A. E. Integrated genome browser: visual analytics platform  
1152 for genomics. *Bioinformatics* **32**, 2089–2095; 10.1093/bioinformatics/btw069 (2016).
- 1153
